# Supplementary material for: Prediction of Two Molecular Subtypes of Gastric Cancer Based on Immune Signature
Source: Front Genet. 2022 Jan 17;12:793494. doi: 10.3389/fgene.2021.793494 (PMC8802764; doi:10.3389/fgene.2021.793494)
Supplement: Supplementary file 2 [file Table3.xlsx]

## Sheet: Sheet1
	logFC	logCPM	F	PValue
TSPAN6	0.0373283	7.07859	65.9729	0.343984
DPM1	0.0253097	7.1741	93.1656	0.501211
SCYL3	0.0140537	7	27.8462	0.731555
C1orf112	0.0862833	6.90174	401.216	0.0461194
FGR	-0.0233347	6.95008	23.1479	0.577868
CFH	-0.138357	7.0372	575.84	0.000522713
FUCA2	0.0373098	7.08676	212.47	0.342284
GCLC	0.0212264	7.0664	52.1988	0.59238
NFYA	0.0543647	6.952	327.373	0.196336
LAS1L	0.0340971	6.99703	186.312	0.40647
ENPP4	0.00532519	7.01026	1.13571	0.89599
SEMA3F	0.0251508	6.99378	43.9278	0.540784
CFTR	0.0158423	6.9411	1.95464	0.707469
KRIT1	0.00301085	7.0201	1.03006	0.94078
RAD52	0.0108371	6.79037	10.5129	0.812551
MYH16	0.0160954	6.64321	5.11822	0.745724
BAD	0.00116344	6.98402	0.165533	0.977509
LAP3	0.00786875	7.16145	5.22891	0.835192
CD99	-0.0250904	7.15149	85.6376	0.508342
HS3ST1	0.0353479	6.98575	36.0843	0.392209
WNT16	-0.000478166	6.74403	0.00606923	0.991856
HECW1	0.0112276	6.76275	7.15358	0.808778
MAD1L1	0.0204237	6.93128	19.5575	0.630366
LASP1	0.0255365	7.22243	150.62	0.487419
SNX11	0.00846846	7.02197	18.1258	0.834385
TMEM176A	-0.00339925	7.10088	0.444285	0.930412
M6PR	0.0138382	7.07684	20.5464	0.725596
KLHL13	-0.11614	6.84822	174.465	0.00830805
CYP26B1	-0.00674716	6.78073	0.612505	0.88312
ICA1	0.0266626	7.02024	28.6982	0.511163
DBNDD1	0.0708953	6.8713	143.681	0.10648
ALS2	0.00993297	6.98168	17.5797	0.810106
CASP10	0.0389378	6.8857	131.737	0.370791
CFLAR	0.00384702	7.09497	1.43675	0.921532
TFPI	-0.0350326	7.06224	47.46	0.376379
RBM5	-0.0112666	7.08695	22.9871	0.773656
MTMR7	-0.00549938	6.68238	1.25437	0.909676
SLC7A2	-0.116127	6.88057	166.259	0.00726519
ARF5	0.0241419	7.099	123.533	0.536136
SARM1	-0.0193123	6.86785	26.273	0.659062
POLDIP2	0.0366072	7.05488	296.256	0.359001
PLXND1	-0.0209274	6.99539	41.9069	0.609588
AK2	0.0454583	7.11781	396.747	0.240308
CD38	-0.00960334	6.92814	1.68386	0.82098
FKBP4	0.0629566	7.03427	327.34	0.118999
RBM6	-0.00765258	7.01128	5.39239	0.8508
CAMKK1	0.00574228	6.85345	4.45737	0.896557
RECQL	-0.0156284	7.05895	25.5994	0.693905
HSPB6	-0.262662	6.84246	1004.12	2.08886e-09
NDUFAB1	0.0210672	7.22363	104.854	0.566401
PDK4	-0.14359	7.01481	428.812	0.000369719
ZMYND10	0.0258866	6.69998	26.0314	0.590303
ABCB5	-0.0311856	6.67508	22.3254	0.521153
ARX	0.0146378	6.72791	2.36127	0.756991
SLC25A13	0.0465079	7.02122	183.276	0.252085
CDC27	0.0142937	7.00324	62.12	0.726729
SLC4A1	0.027931	6.68234	20.7026	0.56523
CALCR	-0.0112064	6.67403	3.08068	0.817971
HCCS	0.0312906	7.05397	122.944	0.433076
DVL2	0.00911344	6.97731	16.8437	0.825883
PRSS22	0.0548043	6.91118	131.837	0.202186
UPF1	0.0268625	6.99685	120.349	0.51298
SKAP2	-0.0290032	7.06153	80.3786	0.464263
SLC25A5	0.0214749	7.26751	107.983	0.550746
HOXA11	0.0873799	6.7943	70.9047	0.0564508
POLR2J	0.0285726	7.09006	151.379	0.466112
DHX33	0.040708	7.02574	221.194	0.314857
MEOX1	-0.147596	6.88157	667.11	0.00062864
THSD7A	-0.102014	6.82727	373.879	0.0219688
LIG3	0.0343427	6.94108	148.957	0.416448
RPAP3	0.0328739	7.02637	141.45	0.416629
ACSM3	0.0247684	6.93838	9.10652	0.558165
CIAPIN1	0.0386317	7.03795	285.716	0.337173
SPPL2B	0.0254901	6.89738	86.1155	0.555229
COPZ2	-0.106216	6.91151	611.804	0.0126285
PRKAR2B	-0.106662	6.95654	403.181	0.0103649
CREBBP	-0.0123582	7.06047	28.9629	0.755505
MPO	-0.00490701	6.6747	0.938949	0.919723
PON1	0.0332592	6.68577	16.5323	0.492765
WDR54	0.00779363	7.01951	4.07763	0.847594
CROT	-0.039011	6.98011	86.8102	0.34439
ABCB4	-0.0498614	6.73082	99.5822	0.289372
RHBDD2	0.0234021	7.06036	63.5466	0.556242
SOX8	-0.069624	6.77925	44.8163	0.128267
IBTK	0.023143	7.07972	58.1329	0.556857
ZNF195	0.038423	6.99657	157.252	0.349794
MYCBP2	-0.020156	7.1071	73.3841	0.603153
FBXL3	-0.0129497	7.06956	24.0889	0.743085
ITGAL	-0.0326083	6.91963	41.7086	0.443705
PDK2	-0.0103909	6.91018	13.297	0.808325
ITGA3	0.034569	6.98955	69.4785	0.4018
ZFX	0.00279836	6.96184	0.902584	0.946548
LAMP2	-0.00130579	7.15834	0.230744	0.972486
ITGA2B	0.0111062	6.71167	4.15322	0.815989
ASB4	0.0219673	6.69813	2.96333	0.648024
GDE1	0.00804007	7.08412	9.83851	0.837785
CRLF1	-0.0876811	6.75338	179.007	0.0587241
OSBPL7	0.00949913	6.9521	3.49917	0.820921
TMEM98	-0.0216908	7.10997	24.9742	0.575281
YBX2	0.071227	6.87769	88.3498	0.103695
MAP3K14	-0.0161192	6.90539	21.6872	0.707286
ABCC8	-0.012842	6.68359	2.78869	0.790849
TMEM132A	0.0446602	6.90592	102.126	0.299703
AP2B1	0.0240879	7.07026	85.7891	0.542773
TAC1	-0.214298	6.67962	289.667	8.19428e-06
CX3CL1	-0.0142793	6.94657	5.31095	0.734036
SPATA20	0.00593476	7.04299	3.50619	0.88227
CACNA1G	-0.0240544	6.73589	31.5031	0.60875
TNFRSF12A	0.0335853	7.06062	49.4171	0.398618
DLX6	0.0327658	6.64604	8.93013	0.508871
MAP3K9	0.0635067	6.84396	221.803	0.153911
RALA	0.0199497	7.16733	98.6056	0.597089
BAIAP2L1	0.0775841	7.0805	276.207	0.0495295
ETV1	-0.0462762	6.83756	67.4847	0.297453
AGK	0.0126221	6.98255	21.1402	0.760039
ALDH3B1	0.0172619	6.95915	8.98685	0.679864
TTC22	0.0495073	6.90328	74.6683	0.251085
PHTF2	-0.0110882	6.95872	15.0622	0.790676
CCL26	-0.0206109	6.78194	6.20816	0.652901
FARP2	0.0303154	6.96758	117.69	0.467059
USH1C	0.0777831	6.99218	139.048	0.0595413
DBF4	0.0593326	7.00688	390.904	0.147189
TBXA2R	-0.0252542	6.85285	49.6972	0.566924
IFRD1	0.0140775	7.05047	19.3924	0.724518
COX10	0.0233378	6.98736	86.9089	0.571558
GTF2IRD1	0.0397774	7.0297	156.923	0.325062
PAF1	0.0126756	7.01295	30.5145	0.755447
VPS41	-0.00795701	7.06467	14.2725	0.840809
ELAC2	0.0358705	6.97193	175.612	0.388594
SCIN	0.00297641	6.9144	0.0991368	0.944522
ARSD	0.0045058	7.03569	1.213	0.910795
PNPLA4	2.65286e-05	6.94338	2.35305e-05	0.999498
MYH13	-0.000585151	6.65702	0.00694416	0.99051
ADIPOR2	0.0224695	7.10626	74.3827	0.563322
CDKL3	-0.0397617	6.76963	88.6951	0.388304
PRSS21	0.0539186	6.81364	17.8446	0.233342
MARK4	-0.00123918	6.9815	0.169951	0.976072
PROM1	0.00633793	7.12819	0.386486	0.869012
CCDC124	0.0287941	6.9126	100.15	0.501851
CEACAM21	-0.00974079	6.7358	3.5036	0.83593
PAFAH1B1	-0.026884	7.08687	138.228	0.492194
DNAH9	0.00415074	6.68426	0.379024	0.931728
KIAA0100	0.0197849	7.00793	54.7776	0.627865
SLC13A2	0.0147488	6.75733	1.93112	0.751324
GAS7	-0.106506	6.94894	876.85	0.0107817
TRAPPC6A	0.0145999	6.9894	15.4862	0.722981
MATK	-0.0309685	6.83502	39.9358	0.486592
CEACAM7	0.140631	6.90339	125.148	0.00118579
CD79B	-0.098814	6.85907	180.934	0.0240368
SCN4A	-0.00319011	6.65365	0.274607	0.948389
ST7L	0.0154869	6.88008	31.967	0.722288
TKTL1	0.0380581	6.7113	10.1219	0.426012
PAX6	0.0114109	6.77478	2.33463	0.804464
RPUSD1	0.041937	6.92244	181.9	0.325919
RHBDF1	0.0139675	6.99516	14.7863	0.733763
LUC7L	-0.00403093	7.00653	1.97725	0.92128
CACNA2D2	-0.0300575	6.83518	38.6681	0.499487
BAIAP3	0.0112573	6.801	4.82212	0.804329
PIGQ	0.0165286	6.88179	24.5288	0.704223
TEAD3	-0.0146046	6.94558	20.6639	0.728344
SELE	-0.075125	6.85237	59.8136	0.0877447
DNAJC11	0.0360058	6.95316	223.856	0.391354
FMO3	-0.0676626	6.88501	85.673	0.117845
MYLIP	-0.035237	7.05288	144.264	0.375811
NOX1	0.0867884	6.73954	53.4998	0.0659537
E2F2	0.102856	6.93177	435.241	0.0158574
PSMB1	0.0196087	7.22739	178.74	0.592884
SYN1	-0.0236068	6.76132	16.3686	0.610461
JARID2	0.00506943	7.01971	3.98531	0.900489
CDKL5	0.0138437	6.73101	7.44238	0.769395
CAMK1G	-0.0162443	6.74439	5.44505	0.728483
NADK	0.0323016	7.04906	148.474	0.419522
DLEC1	-0.00110992	6.72386	0.0532775	0.981306
ADAM22	-0.0433493	6.75259	59.355	0.351357
SYPL1	0.00218363	7.1718	0.645327	0.953716
CYB561	0.0417179	7.07659	234.33	0.290835
SPAG9	0.00409466	7.05337	2.95453	0.918189
AASS	-0.0603055	6.80473	167.858	0.181849
PLEKHG6	0.0790268	6.94237	245.98	0.0620149
SS18L2	0.0268932	7.12731	166.942	0.484776
MPND	0.0164428	6.94541	30.0301	0.696294
MGST1	0.0388516	7.13235	47.4969	0.311982
CRY1	0.00108516	7.07468	0.19527	0.978049
NFIX	-0.0665282	7.01946	211.886	0.0995113
ST3GAL1	-0.0288851	6.96722	31.7513	0.486964
MMP25	0.0192746	6.84034	17.5338	0.664986
IL32	0.0450247	7.06254	83.7822	0.257671
MAPK8IP2	0.0216988	6.79941	14.9398	0.63347
MED24	0.0481094	6.83563	94.9733	0.28177
RHOBTB2	-0.00262841	6.87727	0.628439	0.951924
HEATR5B	0.0110251	7.0132	27.9538	0.786414
SEC62	-0.0216356	7.14704	74.2254	0.569345
CSDE1	-0.0201886	7.14708	95.7452	0.595468
UBE3C	0.0207646	7.03678	80.2999	0.605777
REV3L	-0.0278252	7.0039	110.293	0.495139
MASP2	0.00184647	6.73507	0.195397	0.968717
IYD	0.0358648	6.8277	12.3628	0.423951
FAM76A	0.00131655	6.84843	0.133824	0.976277
TRAF3IP3	-0.0754575	6.8866	175.39	0.0807735
POMT2	0.0153222	6.91088	31.3375	0.720848
VTA1	0.0352929	7.0804	222.442	0.370453
MLXIPL	0.0673701	6.83522	67.1135	0.132265
BAZ1B	0.0191659	7.02072	71.0586	0.636492
RANBP9	0.00220786	7.05471	1.0013	0.955798
ETV7	0.0730979	6.90875	246.259	0.0896841
DYRK4	-0.0181735	7.02496	32.4704	0.652685
ZNF207	0.0200074	7.12457	143.06	0.603568
UQCRC1	0.0359717	7.14874	177.335	0.345303
STARD3NL	0.000315296	7.08478	0.0122784	0.993589
CD9	0.001242	7.14435	0.114002	0.974009
NCAPD2	0.0662887	7.00435	350.723	0.105934
GIPR	0.0178642	6.76706	11.9791	0.699632
PHF7	0.0132373	6.79514	19.1504	0.771535
SEMA3G	-0.0894496	6.85302	331.825	0.041833
NISCH	-0.0444665	7.05271	233.369	0.263535
STAB1	-0.062693	6.97935	308.048	0.128295
FUZ	-0.0180177	6.83636	16.743	0.685634
IDS	-0.0313652	7.07635	111.727	0.425241
PRSS3	0.099488	7.10485	207.801	0.0109175
ZNF200	0.0264085	6.98029	104.869	0.523606
CD4	-0.0255675	6.89594	40.9965	0.55319
LRRC23	-0.00133974	6.78546	0.089139	0.976659
BTK	-0.075639	6.84897	165.608	0.0861539
HFE	0.0181268	6.89845	21.9728	0.674531
SCMH1	-0.0299786	6.98252	92.1986	0.467141
FYN	-0.0501001	7.02669	220.17	0.213544
HIVEP2	-0.0198432	6.94496	50.8449	0.636995
FMO1	-0.135982	6.85286	410.101	0.00192968
LYPLA2	0.0509672	7.03485	403.432	0.206459
CLCN6	-0.020284	6.92386	37.3193	0.633233
MRC2	-0.0584049	7.0029	334.483	0.151718
SLC6A7	0.0267266	6.69432	16.5222	0.57953
TSPAN9	-0.0521097	6.97345	279.532	0.207802
BTBD7	-0.00736985	7.00841	13.8859	0.856458
APBA3	0.000765406	6.96971	0.0998473	0.985309
MKS1	0.0345237	6.86189	170.376	0.433121
ABHD5	0.013922	6.93522	18.1477	0.742299
AKAP8L	0.0147847	6.92027	22.5012	0.728979
MBTD1	0.00895175	6.98325	3.67758	0.828414
UTP18	0.0373068	7.06108	193.221	0.348431
RNF216	-0.0234519	6.97273	61.1699	0.571525
TTC19	0.0224187	7.09179	63.1018	0.566958
PTBP1	0.0319127	7.19131	383.091	0.392694
DPF1	0.0339502	6.76043	68.8281	0.465457
SYT7	0.0233234	6.83233	9.80161	0.601916
LARS2	0.0469263	6.99987	278.493	0.252938
PIK3C2A	0.00512504	7.02332	3.86992	0.899222
PLAUR	0.0411902	7.08483	68.488	0.295008
ANLN	0.10296	7.05009	487.86	0.0103623
RABGAP1	-0.0226341	7.08708	66.0878	0.563149
DCN	-0.107764	7.23036	741.061	0.00304834
QPCTL	0.0390296	6.74073	72.7147	0.406657
PPP5C	0.0281439	6.88462	81.5621	0.517677
CEP68	-0.06571	6.9587	370.231	0.114653
MAP4K3	-0.000203433	7.03392	0.00522716	0.995967
ZBTB32	0.00430523	6.71836	0.604918	0.927826
TYROBP	-0.0499372	7.09966	102.178	0.198648
TMEM159	-0.0110242	6.95806	7.58599	0.791927
GABRA3	0.0416842	6.62607	14.0221	0.406357
BRCA1	0.0761335	6.95052	451.165	0.0709645
ERCC1	0.000335427	7.0415	0.0188848	0.993325
CD22	-0.046652	6.80377	70.3244	0.302292
SEMA3B	0.026345	6.79981	21.5878	0.562641
MBTPS2	0.0156952	6.99863	39.0752	0.701848
PRICKLE3	0.0384416	6.81348	128.67	0.395107
LTF	-0.0780305	6.98121	28.8736	0.0579274
EXTL3	-0.00906874	6.92	7.08266	0.831495
NR1H4	0.0287019	6.70876	6.87275	0.548634
ELOVL5	-0.0518278	7.04497	124.438	0.194053
ALOX5	-0.0411957	7.03195	63.0131	0.305361
CALCOCO1	-0.0386233	6.95869	206.365	0.354469
MAP4K5	-0.0112308	7.01225	20.0817	0.782364
EHD3	-0.0418562	6.86776	151.574	0.338377
PSMC4	0.0363193	7.09108	116.396	0.354202
MAN2B2	-0.0140935	7.03508	18.7482	0.725819
SLC7A14	-0.0402639	6.66724	27.5099	0.409347
CLDN11	-0.182158	6.83594	468.766	3.69728e-05
SLC25A39	0.0569111	7.10023	572.493	0.145254
MVP	0.0180017	7.13094	40.3382	0.63927
NUB1	0.0133015	7.06872	20.7211	0.736842
PGM3	0.0473899	7.01311	169.239	0.245146
RWDD2A	0.00292651	6.93554	0.99093	0.944852
CLK1	-0.0283411	7.08198	106.01	0.470069
POLR3B	0.0334202	6.97074	174.353	0.42203
ANGEL1	0.0172709	6.93773	48.3265	0.683014
RNF14	-0.019483	7.05085	68.8334	0.625008
DNASE1L1	0.0137152	7.01517	20.7618	0.73584
DDX11	0.0601678	6.933	343.625	0.156892
HEBP1	-0.0137643	7.09766	18.7857	0.723897
GPRC5A	0.0657448	7.13007	97.5049	0.0879475
MAMLD1	-0.0878713	6.82102	400.145	0.0493806
CD6	-0.0313779	6.90308	36.1332	0.464965
TACC3	0.0881367	6.94503	463.648	0.0372512
POLA2	0.062882	6.94891	389.028	0.135865
ZC3H3	0.042558	6.93111	227.368	0.316657
CAPN1	0.0343745	7.04953	165.606	0.390257
ACPP	0.0700145	6.84505	80.8962	0.115889
MDH1	0.00360757	7.19035	3.39182	0.922935
SLC30A9	0.00185325	7.0955	0.633969	0.962138
MTMR11	0.0265391	7.07322	29.3094	0.501936
COX15	0.0268321	7.00437	106.315	0.511858
YAF2	0.0133769	6.90558	19.6377	0.755697
ZMYND11	-0.0232814	7.12822	107.926	0.543983
WAS	-0.0415219	7.03101	100.671	0.301766
DPEP1	0.00131781	6.85894	0.0135764	0.976122
BID	0.0532062	7.04695	265.985	0.184622
NPC1L1	0.0485713	6.81131	19.9565	0.283454
XYLT2	-0.00337164	6.94171	1.03113	0.936257
NUDCD3	0.00325365	7.03423	2.05792	0.935563
ISL1	-0.154439	6.96838	516.184	0.000181898
CHDH	0.0615951	6.88714	188.483	0.157082
IL20RA	0.0453544	6.88654	48.2114	0.297156
CLCA1	0.0107554	6.80326	0.400585	0.812658
CLCA4	0.0474132	6.6468	14.777	0.339316
GLT8D1	-0.00637734	7.06433	7.2427	0.872139
ATP2C1	0.0313143	7.06492	97.5211	0.43023
IGF1	-0.203994	6.90181	889.206	1.68304e-06
SLC38A5	0.0263287	6.86413	11.1361	0.549317
RALBP1	0.014868	7.06665	36.3531	0.707515
RUFY3	-0.0347969	6.96772	88.9366	0.402087
CNTN1	-0.189504	6.76318	462.985	3.66346e-05
SLC11A1	0.017406	6.87841	11.5236	0.689855
WWTR1	-0.0697896	7.05388	277.368	0.0787143
AGPS	0.0238279	7.05088	67.0014	0.550964
CXorf56	0.0242726	6.87127	69.3114	0.579462
ATP1A2	-0.24637	6.75899	621.174	7.98455e-08
TTC27	0.0311502	7.00593	161.758	0.446109
ZNF582	-0.0399506	6.80727	123.43	0.376317
VSIG2	-0.0176013	7.00633	2.33221	0.66589
PHLDB1	-0.0443642	6.82519	96.5186	0.321109
MARCO	0.019803	6.77495	5.40535	0.667567
CYP24A1	0.0487671	6.64151	21.1693	0.327217
PRDM11	-0.0174444	6.77095	22.4803	0.705209
SYT13	-0.0122046	7.04494	1.6647	0.76025
SNAI2	-0.074294	6.97931	172.349	0.0713339
CD74	-0.0168664	7.20969	16.4473	0.647682
HGF	-0.103811	6.83288	292.527	0.0193622
ZRANB1	-0.0077656	6.99167	7.45991	0.850094
NCDN	0.00912515	6.86822	11.7526	0.835087
ZFP64	0.0358458	6.9618	232.985	0.391366
MNAT1	0.0248888	6.95457	67.2795	0.552968
SAMD4A	-0.0791717	6.93144	282.4	0.060694
RUNX3	-0.0154838	6.96876	9.797	0.709411
PLEKHB1	0.0210094	6.92974	6.22537	0.620883
SERPINB1	0.0392898	7.15781	99.6828	0.300618
SLC7A9	0.033254	6.87606	9.61422	0.446808
SPAST	0.0245393	7.02036	95.0456	0.545303
NRXN3	-0.192142	6.85274	466.731	1.119e-05
OSBPL5	-0.0325979	6.95033	88.3837	0.43662
AQR	0.022055	7.03989	118.768	0.583009
CPS1	-0.0217623	6.98553	2.31632	0.59721
FHL1	-0.200112	7.09664	1279.48	2.19798e-07
NLRP2	0.0524944	6.85839	14.6541	0.234661
SLC45A4	0.0507895	7.00693	175.421	0.214429
RNF10	0.00675459	7.06126	12.3025	0.864949
ZDHHC6	0.0228001	7.10277	121.124	0.558275
RNH1	-0.00268847	7.04662	1.1314	0.94639
NDUFS1	0.0316971	7.05299	167.919	0.42736
RB1CC1	-0.00193973	7.10504	0.65751	0.960179
ALAS1	0.0451331	7.042	297.744	0.261384
BIRC3	0.0185626	7.13267	13.2395	0.628588
AKAP11	-0.0223146	7.07933	71.9268	0.570151
GLRX2	0.0444227	7.04396	246.512	0.268478
SNAPC1	0.00646036	6.96851	1.4173	0.876608
DERA	0.0196014	7.12663	72.8156	0.610571
STRAP	0.0205806	7.14399	71.5774	0.589758
ABCC2	0.0816737	6.72198	58.984	0.0865084
DEF6	0.00522607	6.92861	1.61849	0.902051
PLEKHO1	-0.0992881	7.00364	540.427	0.0145648
GCLM	0.0503956	7.01673	157.284	0.215729
UBR2	0.010623	7.04153	14.9146	0.79115
EHD2	-0.090686	6.98221	323.167	0.02736
DEPDC1	0.121387	6.9381	513.62	0.0043341
CCDC28A	-0.00635682	7.06685	7.1758	0.872389
RRAGD	-0.024909	6.97715	20.8961	0.546933
HSF2	-0.00746618	6.94333	5.06609	0.859283
PHF20	0.00182818	7.03638	0.596707	0.963725
HSD17B6	-0.127431	6.85913	355.306	0.0035649
NR1H3	0.0184756	7.00537	25.3781	0.651193
NCAPH2	0.0296356	6.9183	97.9848	0.488172
TOMM34	0.0651385	7.06836	442.852	0.100935
SEC63	0.00202588	7.03631	0.638397	0.959807
KPNA6	0.00832152	7.05214	11.3226	0.834785
VIM	-0.0691515	7.22245	498.849	0.0587121
FAS	-0.0287879	6.97476	31.9996	0.486763
RNASET2	0.0219817	7.15778	50.6537	0.562121
CD44	-0.0371383	7.17837	107.437	0.320994
KCNG1	-0.0625161	6.72381	71.2209	0.185467
AGPAT4	-0.0664949	6.85094	135.777	0.131185
SLAMF7	-0.0218905	6.94308	10.5099	0.602961
BTN3A1	0.00570744	7.02934	2.40205	0.88751
MIPEP	0.0511153	7.0026	246.519	0.212508
PRKCH	-0.0550257	7.0119	266.972	0.174961
INSRR	-9.68202e-05	6.64779	0.000252529	0.998438
IFNGR1	0.0165015	7.16878	47.8588	0.661662
B4GALT7	0.0160945	6.97733	39.5463	0.697759
SH2D2A	0.024705	6.87437	49.9051	0.572108
VRK2	0.029737	7.02074	79.8976	0.463655
TNFRSF1B	-0.00754544	7.02725	4.72779	0.851697
VEZT	0.00395577	7.06667	2.0867	0.920434
POU2F2	-0.0139012	6.85558	18.2802	0.752427
BRD9	0.0167004	7.03713	40.6895	0.677949
SNX1	-0.0170512	7.01805	65.1968	0.67393
TBPL1	0.0207959	7.07347	72.8514	0.598623
ARNTL2	0.03648	6.93805	85.202	0.388841
BCLAF1	0.00421602	7.15498	6.82834	0.9115
SLC39A9	0.0306432	7.02173	194.963	0.449943
ANK1	0.00585576	6.79261	1.05459	0.89789
IBSP	0.0523015	6.70092	41.5188	0.277173
TFB1M	0.0369363	7.01529	171.292	0.364197
RABEP1	-0.0289823	7.04447	141.275	0.46836
HMGB3	0.0804288	7.0367	368.231	0.0463738
NUP160	0.0315558	7.02541	137.655	0.435742
BAK1	0.0617158	6.96539	331.479	0.139891
MUSK	-0.0392459	6.71116	32.9164	0.409732
IKZF2	-0.012745	6.85245	6.09864	0.772806
GRN	0.000244105	7.15382	0.00923897	0.994867
CENPQ	0.0572865	6.87297	175.964	0.19136
SARS	0.0134322	7.08245	29.9923	0.732619
RANBP3	-0.0075617	6.97518	9.97897	0.855189
ARID4A	-0.0144075	6.96655	33.6244	0.729091
TSSC1	0.046521	7.03421	304.289	0.248876
PNPLA6	0.00109888	6.96528	0.159293	0.978958
IFT88	0.0118666	7.0005	18.1087	0.771985
ALG1	0.0341585	6.95991	118.685	0.414451
ZCCHC8	0.025305	7.05666	152.059	0.525399
ABCF2	0.0384011	6.97255	180.565	0.355928
LRRC7	-0.0390828	6.63152	28.8988	0.432748
FUT8	0.0162792	7.07275	21.3763	0.680329
UBA6	0.0434885	7.03444	207.283	0.280929
GAB2	-0.026128	6.99436	69.6337	0.523855
ATP6V0A1	0.00688687	7.02063	7.76852	0.865062
PIAS1	0.00276463	7.0557	1.83764	0.944642
SLC4A7	-0.0276683	7.00287	66.4703	0.497802
APBA2	-0.0211081	6.83108	23.3742	0.63624
EFCAB1	-0.00255515	6.64239	0.136531	0.958919
TMSB10	0.0159754	7.31366	144.649	0.650087
ASTE1	0.0169108	6.97109	37.1629	0.684205
RNF19A	-0.00401904	7.08174	2.26368	0.918528
PEX3	0.0206532	6.95873	52.1387	0.621647
GABARAPL2	-0.0179926	7.17288	68.4932	0.631915
MYOC	-0.173804	6.77412	429.269	0.000141374
SH3YL1	0.0319327	7.10732	64.7387	0.411485
VCL	-0.0397811	7.16441	224.826	0.290925
DEPDC1B	0.106063	6.9619	340.915	0.0115497
DAPK2	0.0274558	6.84377	30.8932	0.536787
NSMAF	-0.006459	7.04941	7.4683	0.871461
ADSS	0.0164631	7.06672	54.4867	0.677831
TIMP2	-0.0914637	7.17929	624.121	0.0141974
RFC1	0.00284085	7.00372	1.38149	0.944575
TBC1D23	0.00996848	7.04139	12.1008	0.803753
CUL3	0.00585619	7.0582	12.8656	0.882942
MYOM2	-0.0337979	6.80374	31.925	0.455196
OTC	-0.0238098	6.77179	2.34032	0.605326
CYP46A1	-0.0350635	6.68711	36.4899	0.467568
ZZZ3	0.00994547	7.04372	19.6913	0.803974
SLC18A1	-0.0159289	6.66185	2.83996	0.745208
USP2	-0.0192102	6.77709	14.8643	0.675924
CASR	0.0120334	6.70824	3.58376	0.801323
TUBG2	-0.0350902	6.87	84.6812	0.421818
RPL26L1	0.0231123	7.10296	95.1832	0.552868
FLT4	-0.0137638	6.78736	13.4231	0.763338
NSUN2	0.0483884	7.08106	396.007	0.219671
MFAP3	-0.00247903	6.98339	1.05623	0.952104
METTL1	0.041985	6.96242	245.929	0.315428
HOXC8	0.0479527	6.76525	47.5651	0.301688
AGA	-0.0132205	7.02744	13.79	0.743139
MAT2B	-0.00308929	7.18292	2.20336	0.934188
TLL1	-0.078669	6.6571	128.981	0.108291
EDC4	0.0197022	7.00112	61.1513	0.630477
TRIO	-0.0226696	6.92407	41.811	0.593734
VCAN	-0.0792471	7.13617	330.794	0.0375545
CLEC16A	0.0121757	6.9402	17.7927	0.773092
MSR1	-0.0703066	6.88919	150.85	0.10336
CDH1	0.0747189	7.17922	155.444	0.0471812
SKIV2L2	0.00919304	7.07195	12.5984	0.816017
DNAH5	0.0253001	6.79679	22.9999	0.578835
ZFYVE16	-0.0117255	6.96489	24.331	0.778264
C6	-0.0423876	6.81344	19.6344	0.346236
RAI14	-0.0525889	7.09631	226.746	0.176491
SOX30	0.0266146	6.65928	11.1737	0.588595
PNKP	0.0283464	7.01632	95.9365	0.485754
STAU2	0.00944414	6.97378	10.2884	0.819992
PQLC2	0.0350841	6.87862	187.585	0.421622
CTNS	0.00503479	6.93662	3.6987	0.90523
RTN4R	0.0525333	6.8075	138.914	0.247093
PHF23	0.0182576	7.01999	49.1245	0.65266
CDH10	-0.0759486	6.67967	144.045	0.116354
INPP4A	-0.0235313	6.93393	67.5563	0.577829
RAB27B	0.0300023	7.03293	24.2291	0.456942
PSMA4	0.0297938	7.19778	267.924	0.423389
MYO16	-0.0284081	6.68303	21.7595	0.557213
LSG1	0.0394418	7.01823	233.287	0.331929
PARP3	0.0217121	6.94355	28.8854	0.606715
TNC	-0.14323	7.05785	449.64	0.000284621
THAP3	0.00681315	6.82827	3.90799	0.879034
TDP1	0.0247652	6.9729	20.2989	0.551226
AIFM2	0.048789	6.94003	147.701	0.248981
SPATA7	-0.0189868	6.91375	35.3891	0.656826
RETSAT	0.0288317	7.037	59.325	0.473766
CAPG	0.0283425	7.06677	55.7568	0.474785
AP2S1	0.0201207	7.17688	107.708	0.592259
USH2A	0.0369703	6.60752	22.9403	0.466195
TG	0.0110402	6.71988	3.14374	0.816236
ADAM28	-0.0250173	6.94712	9.40938	0.551323
BARX2	0.0482137	6.80831	54.0921	0.287783
DCUN1D1	0.0115915	7.02917	19.5331	0.773983
ZIC2	0.0938714	6.78939	36.347	0.0410529
LCP2	-0.0206253	6.9604	19.7513	0.621011
TRIT1	0.0324273	7.01935	149.768	0.424604
ADRB1	0.0287708	6.74494	8.93984	0.539564
GUCA2B	0.0327162	6.66788	10.1187	0.50419
CUL7	0.025601	6.90658	131.193	0.55161
CTNNA1	0.00771825	7.18679	14.1783	0.836349
PHKA2	0.013835	6.9512	14.761	0.741815
CNTLN	-0.0403978	6.77087	56.0515	0.380421
EPHA3	-0.200881	6.87702	912.844	3.26035e-06
HSPA5	0.0206464	7.2167	104.42	0.575426
DSG2	0.064821	7.14223	156.826	0.0905726
GEMIN8	0.00769433	6.90701	5.55976	0.857816
OFD1	0.0112744	7.038	14.6801	0.779054
GPM6B	-0.167567	6.87229	478.308	0.000110482
MAGEC2	0.0671659	6.65495	30.4339	0.174345
WDR37	-0.0169581	6.97674	45.341	0.681935
YTHDC2	0.00293663	6.97755	1.14905	0.943462
CTPS2	0.0185847	7.01873	29.6409	0.647071
ATP6V1H	0.00744242	7.0373	8.68892	0.853094
POLR2B	0.0177761	7.1288	82.4316	0.643815
TPR	0.0193462	7.07995	78.3552	0.62322
CP	0.0185851	6.83967	3.32552	0.676375
KIAA0556	0.0127447	6.95421	23.5861	0.761148
DTNBP1	0.00827392	6.9837	10.7042	0.841185
XK	0.00654362	7.00214	0.773283	0.872902
C12orf4	-0.0120695	6.98468	21.2881	0.769689
SCML1	0.0464324	7.00935	77.2843	0.255685
WWC3	-0.0563373	7.01453	202.166	0.164316
ARHGAP6	-0.0799454	6.87896	191.798	0.0653138
MAP4	-0.0191966	7.04463	35.0435	0.631165
GOPC	0.00207568	7.00082	0.675126	0.959545
ROS1	0.0151251	6.66716	3.82527	0.757345
USP28	0.027154	6.91715	108.832	0.525504
HDAC9	-0.0232252	6.89446	14.4278	0.590452
TSPAN17	0.0248448	7.01499	87.3272	0.541407
CC2D2A	-0.0911643	6.87135	534.462	0.0362099
RRM2B	0.00628698	7.00887	3.12283	0.877434
ZNF800	0.0171262	6.93698	34.9897	0.68564
TNFRSF17	-0.0438707	6.87881	14.1122	0.312776
SNX29	-0.0340386	6.81988	79.3472	0.44805
LMO3	-0.244605	6.80741	1014.85	4.47645e-08
MRPS10	0.0252046	7.11066	94.8403	0.515982
GUCA1A	0.0130416	6.72532	4.31914	0.783071
RSF1	0.0025254	7.00658	1.13448	0.950649
VPS13D	-0.0168901	6.95639	46.8966	0.686237
FAM120A	0.0169601	7.18596	76.3382	0.650198
R3HDM1	0.0269696	7.00305	89.6843	0.509983
COL9A2	0.0639197	6.87559	104.016	0.144485
KITLG	-0.0309427	7.0536	52.0314	0.436683
ERCC8	0.00711552	6.86021	4.79785	0.871567
ADAMTS6	-0.0479506	6.79081	85.8781	0.292383
H6PD	-0.0135995	6.93603	23.1227	0.747586
VAMP3	0.00145492	7.16675	0.51053	0.969225
PER3	-0.0491743	6.91238	92.5095	0.249415
UTS2	0.0172083	6.81251	2.99478	0.703245
TNFRSF9	0.0110923	6.81656	4.50897	0.805547
EPN3	0.0693515	6.94246	118.391	0.101269
LTBP1	-0.0919196	7.03139	523.8	0.0218733
RCN1	0.0144482	7.16879	21.3919	0.701561
ELN	-0.140586	6.87463	453.362	0.00118017
RFC2	0.056244	6.97536	248.397	0.176183
ARID1B	0.00361573	6.97234	2.95937	0.930604
CLPTM1L	0.0272324	7.13633	114.165	0.477367
NEDD4L	0.0370816	7.01797	81.1637	0.361673
FOXP3	0.00356884	6.7619	0.463665	0.938686
PPP1R3F	-0.012907	6.782	11.4311	0.778309
HEXB	-0.00179853	7.21321	0.715307	0.961102
PTCD2	0.00573051	6.92382	3.62357	0.892918
KIAA2022	-0.127325	6.69712	271.751	0.00768739
DKK3	-0.077942	7.12806	400.212	0.0416236
ARHGEF5	0.0705164	6.98664	390.029	0.0883601
NFE2L3	0.0605955	7.05245	159.319	0.129932
LIMA1	0.00943678	7.14908	7.76385	0.804135
LETMD1	0.0123244	7.06535	24.8032	0.755911
SLC4A8	0.0119147	6.7703	5.48036	0.79651
LAMC3	0.0366512	6.77771	30.0211	0.426427
PTGER3	-0.167062	6.82481	698.088	0.000170847
TNIP3	0.0133709	6.69	2.91311	0.781988
MAPK9	0.0106074	7.05223	19.1793	0.790362
COL23A1	-0.0292402	6.78742	43.5916	0.522022
BCAR1	0.0300461	6.98164	91.6154	0.467844
HERPUD1	-0.0173995	7.16936	25.7264	0.643761
HOMER3	-0.033636	6.89126	60.0806	0.436241
RAD51	0.0797578	6.95984	308.955	0.0573952
POLQ	0.114502	6.93631	625.744	0.00715289
PIK3CB	0.0394747	7.03213	170.478	0.328163
CYBA	0.0282607	7.17824	70.5305	0.451828
HEBP2	0.0209692	7.17416	78.4062	0.577257
MPHOSPH9	0.0374197	6.91574	118.905	0.382257
PLEKHA5	-0.0106336	7.04103	10.1886	0.790753
PRSS8	0.0711014	7.0778	113.377	0.0721441
RRP12	0.0612197	6.91581	243.181	0.153428
TTC17	0.00305874	7.04249	1.45197	0.939165
FSTL4	0.0223798	6.68024	8.1958	0.645235
FOXN3	-0.0395742	6.99934	285.063	0.332751
AKR7A2	0.0136996	7.12414	27.3722	0.722128
MRTO4	0.0622716	7.0196	383.918	0.125815
NNAT	-0.102243	6.77834	209.024	0.0253395
USE1	0.00588058	6.95625	4.73495	0.888298
MCF2L2	-0.00737326	6.62794	0.880866	0.882785
NRIP2	-0.0639923	6.78964	213.02	0.159886
LAMA3	0.0532901	7.00772	51.9947	0.192598
ANAPC4	0.00339093	7.06649	2.11199	0.931769
KCNQ1	0.0314598	6.96676	32.8501	0.450633
TRAPPC3	0.0086829	7.09588	20.7942	0.824028
THRAP3	0.0169626	7.00781	49.1107	0.677682
PHPT1	0.00892775	7.10859	11.4173	0.818045
ENTPD2	0.0649826	6.8041	82.7805	0.153276
LY75	0.0263625	7.0162	32.5206	0.516771
ARID4B	-0.00508932	7.06089	2.84546	0.897983
OPN3	0.0141354	6.98862	9.15317	0.731544
SDCCAG8	0.00758799	6.91416	4.67157	0.859244
PTPRN	-0.0297366	6.73467	16.8264	0.527037
HHAT	-0.0119447	6.84749	7.30739	0.787272
KIF1B	-0.012279	7.05415	18.1723	0.75776
FOXC1	0.0360188	7.03593	23.9795	0.371274
TBC1D22A	0.0156284	6.99213	48.5506	0.703983
SYNE2	0.0216787	7.02616	32.6962	0.591991
PLEKHH1	0.0578613	6.97542	169.502	0.164104
ATP9A	-0.00018797	7.12132	0.00255138	0.996109
CBLN4	-0.0289024	6.6663	19.6169	0.554147
CHRDL2	-0.240436	6.89805	896.041	1.68534e-08
RELT	0.024301	6.86392	37.1172	0.580486
GALC	0.01026	7.0883	6.61937	0.793509
KCNH2	-0.0925828	6.91248	256.985	0.0297393
CUL1	0.0105875	7.04314	26.3764	0.791669
CYFIP2	-0.0694144	6.99981	205.605	0.088747
EIF2AK2	0.00752202	7.09972	9.05943	0.846949
USP36	0.0123269	6.95556	17.3236	0.76859
MCOLN3	0.0118023	6.81592	1.81075	0.793452
CCDC85A	-0.0878712	6.72563	140.243	0.0621144
PUM2	-0.00727476	7.11486	14.621	0.850711
MRPL43	0.0163847	7.07451	44.1097	0.678112
ITIH4	0.00433123	6.73692	0.567115	0.926641
ITIH1	0.000150104	6.69098	0.000448381	0.997518
ZFR	0.00206281	7.11779	1.10653	0.9574
ZNF280C	0.028717	6.84974	58.1014	0.516949
NPFFR2	0.0112135	6.63373	1.46822	0.822173
PHF21B	-0.0292997	6.6272	15.063	0.557646
TRAF1	-0.0175174	6.85096	21.8004	0.691659
RC3H2	0.0133602	7.01645	30.7243	0.742268
IL17RB	0.1031	7.00312	267.053	0.0121631
TRAF3IP2	0.0198083	7.03647	42.7629	0.622512
GYG2	0.0240406	6.87135	11.5975	0.583071
DCBLD2	-0.0583546	6.95314	98.4859	0.162562
SERPINB3	0.089098	6.72645	41.3116	0.0609654
SOAT1	-0.00941756	7.00055	5.38449	0.817893
PKP2	0.059551	7.0148	127.345	0.144111
MSH4	0.028188	6.6317	11.7448	0.572918
F7	0.0261439	6.76198	16.345	0.573574
GDI2	0.0165409	7.22388	66.7376	0.652465
PRDM1	-0.00460146	7.03708	1.13755	0.9088
ATG5	0.0143032	7.07889	29.6696	0.7165
TMCC3	-0.0140042	6.97335	9.82913	0.735514
MTA3	0.0364057	6.99687	191.593	0.375544
USP13	0.00491886	6.9569	1.53623	0.906438
ATP11B	0.000288499	7.04539	0.00727402	0.994247
LAMC2	0.0652091	7.00694	87.3019	0.111252
SEC61A1	0.0228107	7.15351	116.339	0.548313
PPP1R12A	-0.0386965	7.08255	158.408	0.323573
RASGRF1	0.0155537	6.72831	7.49265	0.742267
CAMK2B	0.0010446	6.78831	0.0420826	0.981774
CROCC	-0.00891675	6.83654	5.77088	0.84129
ATP2B4	-0.0839998	7.06277	479.996	0.0334111
RIOK2	0.000757719	7.0213	0.0920134	0.985073
YIPF1	0.0130192	7.04296	40.3743	0.745379
DGKG	-0.0423886	6.72612	47.1636	0.369187
FLYWCH1	-0.00882171	6.86636	9.65135	0.840491
UNKL	-0.027471	6.90244	78.8789	0.522586
TBXAS1	-0.029756	6.93525	39.9871	0.481119
PARP12	0.0452408	7.08838	185.614	0.249357
ALDH18A1	0.0321207	7.12922	176.366	0.403736
TARBP1	0.0287631	7.02082	90.897	0.478383
MXD1	0.0477688	7.05666	104.383	0.231221
SLC2A3	-0.0415003	7.04619	62.7072	0.298362
PSD	-0.0920017	6.79018	283.071	0.0429552
CTDP1	0.0209581	6.92383	77.9602	0.622798
STYK1	0.0659989	6.89457	92.9674	0.128104
WNK1	-0.0147482	7.06006	44.9132	0.710205
CCAR1	0.0260183	7.05489	82.0279	0.514177
OGFR	0.0399922	6.9923	186.197	0.331556
GNA15	0.0116321	6.96221	5.18881	0.780559
CREB3L3	0.0392735	6.71906	12.7534	0.409388
PIGV	0.0113626	6.98567	15.4295	0.783004
PTPRU	0.0210696	6.90734	20.7218	0.623924
RIMBP2	-0.0410649	6.72136	24.4946	0.385618
COL11A1	0.0213063	6.90051	2.17997	0.621281
QSER1	0.0138946	7.00799	23.7409	0.733446
ACAA1	0.0254892	7.08547	108.225	0.516455
BCAT1	-0.0290695	6.97338	22.7461	0.482812
LZTS1	-0.0596525	6.84045	238.266	0.178268
PRDM6	-0.0966422	6.82892	311.931	0.0298865
SPAG4	0.0291368	6.89651	28.8338	0.500379
NCKAP1	0.00106602	7.13614	0.129847	0.977779
MRPS35	0.0380609	7.13759	129.684	0.32068
GUCY1B3	-0.121788	6.99714	853.384	0.00278781
TNK2	0.0159751	6.9457	16.1815	0.704469
MON2	-0.0032801	7.03901	2.5413	0.934861
CDH3	0.0919327	6.97888	124.315	0.0271006
GPBP1	-0.000663732	7.1237	0.121678	0.986245
DGAT2	0.0592198	6.94953	160.1	0.159943
CS	0.0216245	7.16293	101.897	0.567525
LTK	0.0402888	6.75623	28.6391	0.387668
ELMO2	-0.00171123	7.00041	0.465334	0.966644
APPBP2	-0.0235474	7.03752	97.3617	0.557233
POLD1	0.069265	6.94476	378.702	0.10129
SEZ6	-0.00710348	6.72643	1.39682	0.880588
EIF4B	-0.00393465	7.18432	3.99894	0.916178
SLC6A16	-0.0517479	6.7297	78.4046	0.271764
SPHK2	0.0248129	6.98812	54.2483	0.547375
RPL18	0.0105234	7.27406	61.8227	0.769172
CA11	-0.0460568	6.83779	121.322	0.299695
ISOC2	0.0329799	7.01761	102.3	0.417175
U2AF2	0.0321003	7.06814	211.079	0.418028
EPN1	0.0228077	7.01236	63.9933	0.575519
MED29	-0.00348835	7.02827	2.19341	0.931104
ZNF275	-0.00939644	7.00764	12.0822	0.817656
MTMR1	0.0278945	6.99965	195.801	0.496342
GPC1	-0.0176982	6.94416	15.5775	0.673998
ADCK1	0.0237092	6.90515	67.4254	0.581628
HAGH	-0.00265379	7.0418	1.46602	0.947207
RNF4	0.0125224	7.07765	39.9266	0.750662
CASP8	0.0224987	6.97521	70.2684	0.587754
LIMCH1	-0.0854249	6.94321	239.412	0.0416673
TM7SF3	0.00967433	7.08005	7.01973	0.805817
DLX3	0.0594139	6.67042	39.392	0.225196
SPA17	0.0431743	6.98024	152.453	0.297567
TSPAN32	-0.032089	6.81787	30.1609	0.474999
WISP2	-0.103067	6.72276	158.771	0.0287955
DMRT3	0.00377363	6.66831	0.307476	0.938476
ST3GAL6	-0.0497127	6.84981	104.495	0.259825
ATP2C2	0.0372835	6.91862	23.7474	0.383278
NGFR	-0.137098	6.72693	264.133	0.0035024
CDON	-0.0706275	6.80477	195.333	0.117706
TAF2	0.0304825	7.07524	158.887	0.44023
HIPK2	-0.00206907	7.05667	0.281887	0.958524
TNPO3	0.0276972	7.04777	102.92	0.488986
RFXANK	0.027123	7.01976	126.608	0.504009
TMEM161A	0.0280822	6.98078	167.392	0.497568
CTSA	0.0256754	7.15467	68.7584	0.499076
SLC12A2	-0.0120356	7.13969	4.96463	0.752574
SNX24	0.00228836	6.90192	0.348415	0.957607
EYA2	-0.0311153	6.86194	7.98158	0.478261
CNN2	-0.00766901	7.04198	5.85814	0.848198
ABCA7	0.0347413	6.89636	63.9217	0.421861
SNCAIP	-0.0824055	6.86858	85.3145	0.0587963
DDX20	0.0168673	6.96546	52.7532	0.685827
BTBD1	0.00889089	7.10197	11.4855	0.819357
BCAS1	-0.00159254	6.95481	0.0288471	0.969667
CHI3L2	-0.0931863	6.82059	136.805	0.0371374
SBNO2	0.0337767	6.91655	85.8273	0.430005
PMS1	0.0135522	6.96185	19.1498	0.745572
HMG20B	0.0104143	7.03078	12.6257	0.79623
CALCRL	-0.090605	6.93516	377.758	0.0313985
TAF11	0.0236648	6.97925	156.327	0.567781
ANKS1A	-0.021642	7.0771	72.8097	0.582257
AP3D1	0.0187332	7.09563	102.294	0.631639
ZNF76	0.0116139	6.89305	9.00274	0.788393
SLC9A3R2	-0.009174	6.75458	3.10873	0.843766
NTHL1	0.0231784	6.97428	43.9507	0.57672
GNAI3	0.0176761	7.12251	65.8449	0.646686
OAT	-0.000587424	7.19489	0.0270373	0.987402
WDR3	0.0346642	7.0242	231.975	0.392273
PKN2	0.0253052	7.04449	64.9385	0.527894
WDR18	0.0455003	7.02677	261.916	0.261154
TRAM2	-0.0271971	7.03645	92.2016	0.497959
NTN1	-0.121243	6.8425	418.256	0.0060036
GLP2R	-0.0760498	6.65912	113.326	0.120175
MCM10	0.147704	6.92594	615.676	0.000573537
DGKA	-0.0164579	6.92871	17.5817	0.697969
ERBB3	0.0569149	7.13112	160.23	0.139223
ANKRD44	-0.0582645	6.8947	99.6618	0.176107
KARS	0.0286483	7.19301	255.453	0.442442
ADAT1	0.0200911	6.95429	51.5294	0.631931
TBC1D22B	0.0339883	6.91549	184.237	0.427383
NDUFB4	0.0164716	7.04059	70.6584	0.681597
SPEN	0.00738739	7.0573	9.53121	0.852727
MYLK	-0.169195	7.11537	928.297	1.00925e-05
ZC3H15	0.0240987	7.11256	62.8132	0.534159
MAP2K4	0.0101297	6.99522	15.5564	0.805117
SNAP91	-0.14356	6.65238	249.18	0.00336687
SLK	0.00893542	7.0968	9.5613	0.81892
CYB5R4	0.00938469	7.02836	9.62216	0.816202
COL17A1	0.0407167	6.86907	14.8509	0.35359
GSTO2	0.0671704	7.05351	149.719	0.0931694
SEC61A2	0.0463879	6.82845	183.362	0.301148
PRKCQ	-0.0182727	6.89998	11.5221	0.671184
TLE2	-0.0469372	6.9495	92.0964	0.262504
ASB1	-0.0265377	6.90242	67.1127	0.536835
FAM107B	-0.0129584	7.14001	9.11658	0.734243
ME1	0.0158654	7.02833	7.82905	0.694474
TBC1D1	-0.0240885	6.96584	92.1599	0.562488
MTHFD2	0.0623955	7.14417	388.896	0.102928
SLC9A7	0.0356901	6.88019	55.5371	0.413281
FOXJ2	-0.0215563	7.01015	87.1852	0.596143
YBX1	0.0210957	7.24241	147.742	0.562421
PDE4A	-0.0194911	6.87529	29.2516	0.654843
PPP2R5A	0.00979342	7.0681	18.559	0.804609
CTNNA2	-0.0197621	6.67598	5.15638	0.684365
ELAVL1	0.0149852	7.07113	42.204	0.704696
TIE1	-0.0808989	6.84728	363.716	0.0666199
DIP2B	0.015248	7.03913	47.8937	0.704274
SMARCD1	0.0304468	6.97798	152.25	0.462772
NFYC	0.0153702	6.98897	59.3276	0.709088
ZMYND12	0.0134975	6.80055	6.73002	0.766514
SLC9A3	0.0357242	6.69464	18.7122	0.459087
NGEF	0.0386259	6.90296	46.4952	0.370317
ASPM	0.112621	7.01876	490.866	0.00579973
CD84	-0.0575522	6.90613	128.914	0.178874
SPI1	-0.021387	6.80663	14.1249	0.636234
ZNRD1	0.0413515	7.04025	293.593	0.303783
MPPED2	-0.139899	6.71489	345.638	0.00307727
CLDN18	-9.17015e-05	7.17833	5.09299e-05	0.998049
ZBTB11	0.015313	6.99629	31.9022	0.709095
ATXN3	0.0100741	6.92984	11.0369	0.812406
GOLGA5	0.0121617	7.11378	41.6121	0.75342
FGFR2	-0.0428654	6.93475	36.6412	0.309943
LRRC40	0.0143099	7.01086	30.6266	0.725422
ISOC1	0.0118192	7.0824	18.0627	0.763692
EML1	-0.160675	6.96941	1105.8	9.72956e-05
TRMT11	0.0316976	7.05607	138.628	0.426645
THUMPD1	-0.0056035	7.0948	5.41183	0.88586
ATG2B	-0.000302292	6.96062	0.017308	0.994224
ARFGEF1	0.0232097	7.08787	96.4222	0.554137
ZFAT	0.0134162	6.88312	36.3598	0.757769
MTFR1	0.0496458	7.08449	269.308	0.207188
STAG3	0.0175433	6.84599	12.1166	0.692572
FECH	-0.00575149	6.94243	3.25222	0.89143
MYO9A	-0.0455237	6.97012	220.967	0.272127
DDX3Y	-0.00352809	6.86363	0.039868	0.935956
PFKP	0.0448245	7.08733	144.375	0.253973
IDI1	0.0412889	7.07194	155.689	0.296921
SP100	0.00556501	7.02218	3.69918	0.890688
KLF6	-0.00920792	7.16927	10.8138	0.80676
NEO1	0.0004959	6.99356	0.0181236	0.990366
TRAM1	0.00452999	7.23326	6.28066	0.901342
PHKA1	0.0116515	6.898	4.81356	0.787189
TNFRSF1A	-0.0104469	7.09881	19.63	0.788533
CACNB1	0.00881319	6.7807	4.78779	0.847851
EVI5	-0.011957	7.02982	10.7627	0.766684
STOML1	0.00321377	6.93724	1.26361	0.939397
DHX29	-0.00662861	7.04308	9.691	0.868526
DNTTIP2	0.0143358	7.0628	34.3538	0.718032
TP53BP1	0.00967368	6.97369	15.2218	0.815705
TRO	-0.0883526	6.8053	298.206	0.0500579
RRP15	0.0342432	7.02741	141.733	0.397277
RHOA	0.00317572	7.22695	3.09528	0.930947
DHX8	0.0301973	6.9617	146.035	0.470126
PRKCZ	0.0567894	6.99945	227.55	0.166839
IARS2	0.0345398	7.15373	257.43	0.363649
SYT1	-0.0364008	6.79656	15.3174	0.422964
NAV3	-0.154077	6.77581	461.416	0.000741439
IDH3G	0.0180705	7.07299	46.3192	0.647413
ROGDI	-0.0125376	6.93629	17.5878	0.766681
PDZD4	-0.0956151	6.75151	261.237	0.0393985
ROCK1	-0.0132699	7.05342	21.2982	0.738976
CBFB	0.0224209	7.09109	68.4003	0.567052
PDK3	-0.0103053	6.98312	7.11549	0.802771
HYAL2	-0.0137033	7.02426	30.7568	0.734508
HDAC4	-0.0455455	6.95309	142.101	0.276068
RASSF1	0.00654295	6.96665	5.42557	0.875161
FGFR3	0.0853733	6.98939	108.134	0.0390018
IFI35	0.029009	7.05678	61.1497	0.466684
HEATR6	0.00384226	6.92129	1.83727	0.92817
COASY	0.0524311	7.08568	413.155	0.182645
PLEKHH3	0.00327114	6.87525	0.960761	0.940271
MEF2A	-0.0395432	6.99859	216.815	0.333314
OTUD5	0.0105144	6.95714	23.1595	0.801669
TFE3	-0.0139773	7.00196	36.4982	0.732298
TBC1D25	0.00734076	6.90071	12.5404	0.864722
ACSL4	-0.00968303	7.00702	6.31819	0.812252
INPP5A	-0.0408591	7.05801	170.471	0.303069
GPKOW	0.0244012	7.00481	87.4307	0.550683
GRIPAP1	0.00436514	6.98075	0.700802	0.915915
FTSJ1	0.0311476	7.0575	161.268	0.434373
PRR11	0.0600893	7.04956	260.326	0.133714
REEP1	-0.164409	6.89286	364.513	0.000126043
ATP11A	0.0407495	6.98049	162.337	0.325397
POLR1A	0.0350056	6.91409	144.375	0.414047
LAPTM4A	-0.00985752	7.19627	23.1565	0.790795
TTC7A	0.0275354	6.91458	95.1042	0.520269
SRBD1	0.0111947	7.00061	29.8671	0.784547
KIF2A	0.0405359	7.00333	137.131	0.322347
RASGRP2	-0.105357	6.8627	566.275	0.0158932
PSME4	0.035123	7.07657	250.337	0.373658
IFT80	0.000467948	6.96614	0.0334315	0.991034
SIRT2	0.00297992	6.94409	1.4968	0.9436
PPP2R5B	-0.00658548	6.92124	5.5068	0.877139
PYGM	-0.129987	6.74763	374.369	0.00512068
PITX1	0.0112461	6.95734	3.99198	0.788172
TRPC7	0.0130853	6.59976	2.61767	0.797112
MAST4	-0.0401508	6.92886	118.274	0.343119
SDK2	-0.0349414	6.78703	26.2684	0.444188
NUP133	0.0183449	7.03485	73.1648	0.648682
NUCKS1	0.0136691	7.1399	22.8396	0.720682
VPS35	0.0130402	7.17536	41.5421	0.728602
DNAJA2	0.0111784	7.12702	25.7883	0.771344
KCNAB2	-0.00357479	6.88582	1.54697	0.934351
ABCC9	-0.121933	6.76389	418.08	0.00808598
GAL	0.0177527	6.84022	1.82854	0.689999
CLEC2D	-0.0173118	6.91567	12.2028	0.685132
FUNDC1	0.0224111	7.05753	38.0791	0.573601
MAOB	-0.107492	6.94339	182.023	0.0102845
RORA	-0.0854344	6.91351	389.491	0.0448498
DRD4	0.0208513	6.67759	12.4641	0.668404
TGFBR3	-0.108954	7.04454	420.285	0.00618771
KIAA1107	0.0122621	6.8297	11.164	0.784055
HES2	0.046964	6.77836	34.9568	0.308272
ATP1B3	0.0216926	7.16686	83.2997	0.565573
NEDD4	-0.0321266	6.93545	65.8551	0.446773
PIGB	-0.00670645	6.98109	6.6933	0.871039
MAPK6	0.0384868	7.14177	275.907	0.314328
GNB5	-0.044547	6.95275	162.88	0.286843
RAB27A	-0.0174477	7.06541	15.1213	0.659338
LRP6	0.00435963	6.97984	2.85564	0.916059
GUCY2C	0.0171957	6.94562	1.81457	0.683106
SCT	0.00953136	6.64168	1.85277	0.847793
IKBKAP	0.019354	6.98749	68.4452	0.63884
NUCB2	-0.00209303	7.09377	0.349357	0.95727
PFN2	-0.056373	7.06565	75.9888	0.15344
PTPN3	0.0747343	6.96541	274.718	0.0740651
SPTB	0.00340509	6.75907	0.601137	0.941584
DAPP1	0.0011665	7.00764	0.0704298	0.977179
FGF10	-0.161031	6.69608	353.565	0.000739226
SLC44A1	0.0257504	7.17657	111.453	0.493286
SMG6	-0.0178382	6.83163	18.6629	0.689348
EXOC5	-0.000976471	7.02039	0.228937	0.980771
CLTCL1	0.0133029	6.79041	6.65201	0.771005
FSTL3	-0.0446088	6.94715	66.615	0.287557
DGCR2	0.0238612	6.9959	77.5594	0.561286
RNF126	0.0399355	6.98901	236.171	0.333044
MNT	-0.00766635	7.01477	9.86341	0.850276
ZXDC	0.025589	6.93247	68.9159	0.546439
JMJD6	0.0232925	6.99562	108.53	0.570697
POLB	0.0334764	7.07689	165.635	0.396353
ST6GALNAC1	0.013608	7.05901	2.3695	0.732255
WIPI1	-0.00956267	7.01708	6.14531	0.813621
FRMPD1	-0.00336885	6.68326	0.224535	0.944574
GBA2	0.0261749	6.97186	76.8624	0.529047
NDST1	-0.021327	6.91487	53.7768	0.617485
ASNS	0.0355467	7.04616	67.0745	0.375132
AP3M2	0.00228358	6.97253	0.435062	0.956131
CNGB1	0.0239453	6.73284	15.3745	0.611937
ST6GALNAC2	0.0112203	6.88235	3.76936	0.796516
PABPC1	0.0188059	7.27148	123.012	0.600595
TESK2	0.00465704	6.91955	2.82722	0.913075
CSNK2A2	0.00236543	7.05347	1.03615	0.952677
PTPN21	-0.027194	6.90019	71.9962	0.527278
CAMK2A	-0.0274143	6.70521	17.5136	0.566269
TCOF1	0.0325766	6.92723	241.844	0.444027
CDC42	0.00911408	7.12057	7.81535	0.81325
OSBPL3	0.0514117	7.0021	201.012	0.20999
EPHA8	0.0274479	6.72196	19.206	0.563337
SLC12A3	-0.00143283	6.6924	0.0657875	0.976291
RAD18	0.0492769	6.85131	229.157	0.266298
ATP2B1	0.0105693	7.04743	11.4596	0.791584
TRPM5	0.0454908	6.65131	30.8621	0.357958
NCK2	0.00142326	7.11579	0.331586	0.970628
MAP4K4	0.0017685	7.01578	0.309424	0.965268
MGAT4A	0.00905591	7.03422	5.26238	0.822018
RPL31	0.00299744	7.27326	2.71225	0.933381
WDR1	-0.00526189	7.16627	8.62284	0.889017
SNX13	0.0149679	6.98236	28.7679	0.717269
ARHGAP10	-0.054006	6.96033	233.992	0.194665
RPS6KA2	-0.0685543	6.99416	347.581	0.0937203
ING3	-0.00357209	6.99821	1.99515	0.930509
VASH1	-0.0467769	6.89559	139.683	0.277503
LMCD1	-0.060434	6.99019	266.638	0.140493
SEL1L	-0.00457144	7.06172	3.96172	0.908281
TRIP13	0.116424	7.01712	567.275	0.00438495
ATP6AP1	0.0165341	7.15958	50.9146	0.66244
TCF3	0.0334007	7.02463	127.502	0.409622
TRIB2	-0.0167706	7.05162	12.7871	0.673889
DAZAP1	0.030733	7.10985	184.977	0.428677
MBD3	0.0140961	7.00241	27.4746	0.730461
HLTF	0.000204382	7.05921	0.00191945	0.995897
FAM50A	0.019764	7.1134	66.6573	0.609923
FAM3A	0.0134765	7.01549	19.3102	0.740227
CPSF1	0.0373305	6.90178	79.99	0.386836
MYO3B	0.00133482	6.66946	0.0205406	0.978201
CYBRD1	-0.151992	7.10355	974.793	8.14104e-05
CDH19	-0.207986	6.74591	428.511	7.082e-06
PDCD2	0.031074	7.02367	117.277	0.443167
SLC6A15	0.0146246	6.65079	3.08487	0.767257
RDH11	0.0184923	7.11976	59.1008	0.632029
PRKACA	-0.00182116	6.91486	0.770792	0.96602
ACTN1	-0.0466903	7.18573	215.882	0.210308
ZFYVE26	-0.0104344	7.00422	16.4147	0.798257
PTPN18	0.0138227	6.94221	42.5087	0.743181
LIMS2	-0.136498	6.92951	854.417	0.00119533
LNX1	0.033645	6.93234	46.859	0.42804
ALDH3A2	0.0185466	7.10694	33.1472	0.63316
TFRC	0.0562668	7.20034	432.151	0.130693
SREBF1	0.0522279	6.9944	157.508	0.204622
AFF4	-0.00984625	7.02326	13.8582	0.807613
UBE2D1	0.0106915	7.00097	20.0777	0.793967
MPP5	0.0148673	7.03433	39.6027	0.711974
RHOBTB1	-0.0330032	6.96431	64.9648	0.427632
SMC1A	0.0292958	7.03566	139.914	0.466984
HSD17B10	0.033944	7.09618	209.198	0.385305
MARK2	0.0523492	6.91936	227.561	0.221114
HMMR	0.100952	7.05662	445.318	0.0116694
CHFR	-0.0243955	7.01047	30.919	0.548545
TRHDE	-0.0273613	6.75247	7.84931	0.556741
FCGR2B	-0.0840171	6.9285	193.096	0.0468119
NFATC3	0.0027822	6.96267	1.61018	0.946834
TRNT1	0.0273986	7.01723	88.7526	0.500236
ACADVL	0.0144259	7.16031	36.8502	0.703156
STK10	-0.0140976	6.9661	28.7843	0.734761
FBXW11	-0.0108764	7.04335	23.655	0.785847
CRMP1	-0.0432677	6.8824	86.1175	0.318578
EVC	-0.117945	6.86322	457.964	0.00689423
DERL2	0.027303	7.0849	138.53	0.487226
SIDT1	-0.0312597	6.88172	27.4126	0.471613
NDE1	0.0168289	7.0005	23.3986	0.681191
MRVI1	-0.134714	6.96344	709.372	0.00113974
TMEM38A	0.0468167	6.86003	48.6478	0.288613
AP1M1	-0.0196923	7.00993	50.9877	0.628367
PVR	0.0536459	6.9485	209.911	0.203107
XRCC1	0.0205872	6.94343	67.4267	0.625478
SCARB1	0.0650027	6.97195	237.3	0.118828
CYP2W1	0.0526135	6.80198	42.5491	0.247782
MCM2	0.100727	7.05106	591.038	0.0120917
MOV10L1	-0.00401003	6.68825	0.514166	0.933858
PANX2	0.0121691	6.77673	3.75566	0.791552
ALPK1	0.00315723	6.93729	0.540226	0.940459
LLGL2	0.0709356	6.99509	340.706	0.0851521
PDE8A	0.00969352	7.01561	15.7502	0.811456
CLCN4	0.0390414	6.8286	27.1128	0.383937
NLE1	0.0508211	6.89772	219.929	0.240123
SDHA	0.0294388	7.15199	168.609	0.439018
SMARCE1	-0.00487198	7.11151	2.48714	0.899871
ADAM11	0.013936	6.7055	6.39799	0.771093
PPP2R3A	-0.0687076	6.93744	154.501	0.102689
FERMT2	-0.14189	7.09965	1162.61	0.000243001
ABCB11	0.0134728	6.6297	3.95745	0.787646
DHRS9	0.00934639	6.95844	1.02238	0.823188
PTGS2	-0.0257911	7.0291	8.67944	0.521999
IGF2BP2	0.0645105	7.04784	154.877	0.107802
MAP3K13	0.0290266	7.00151	80.8635	0.478645
ST6GAL1	-0.0119266	7.03821	5.05959	0.766313
TBX21	-0.00851876	6.75985	2.14367	0.854385
FRY	-0.0858485	6.94188	376.703	0.0407976
PICALM	-0.00347129	7.12507	3.15968	0.928099
NSF	0.0191804	6.98434	28.6779	0.642379
GLI2	-0.0721999	6.85357	283.76	0.100646
CLASP1	-0.0124928	7.0061	30.3662	0.759337
MRPS34	0.0357854	7.02171	143.763	0.377767
NOTCH3	-0.0489565	6.96054	140.475	0.239816
CLNS1A	0.0273956	7.13867	145.435	0.474235
PPP2R2C	0.0140339	6.74204	1.90979	0.76493
TEAD2	-0.0326205	6.96108	49.4583	0.433776
EED	0.0250779	7.0311	78.8731	0.534335
TSG101	0.016671	7.15107	75.668	0.661129
ATP2A3	-0.0124713	6.99108	5.83709	0.761496
CA12	0.00407816	6.99606	0.260121	0.920814
MGLL	-0.0363731	7.08111	64.742	0.353876
NTN4	-0.0621069	7.0083	152.82	0.126313
BCS1L	0.034328	6.99534	221.919	0.403708
NUAK1	-0.0678211	7.02458	295.3	0.0922472
DPP8	-0.00429388	7.07555	5.19491	0.913241
SLC24A1	0.00474095	6.88321	1.73157	0.913168
ZNF532	-0.0440733	7.01801	157.954	0.276089
SCARF1	-0.00735626	6.83186	7.09689	0.869123
LMAN1	0.0101233	7.07762	15.3605	0.79724
ZZEF1	0.000132634	6.98854	0.00237525	0.99743
ENO1	0.0409808	7.21792	333.147	0.266561
TUBE1	-0.00340195	6.92821	1.07913	0.936129
ARHGEF10L	0.0128024	6.95557	12.1088	0.759939
TXK	-0.0121248	6.68948	4.8625	0.801642
WSCD2	-0.109236	6.76071	191.559	0.0179319
KCNQ2	0.0200591	6.69442	6.76182	0.677388
TACR2	-0.198813	6.78795	426.516	1.12665e-05
ACTR6	0.0131988	7.03407	22.5056	0.743093
TIPIN	0.0790613	6.94617	455.444	0.0613947
SRI	-0.000542586	7.1462	0.0305215	0.988633
EIF4G3	0.00183618	7.0321	0.559943	0.963644
NUP37	0.0426117	7.11903	268.063	0.270668
SEMA3A	-0.075563	6.8442	142.31	0.0872705
GTSE1	0.0745028	6.96183	494.471	0.0754938
SEMA3C	-0.0606685	7.04427	103.85	0.128411
ACAT1	-0.0113228	7.08162	13.0239	0.773135
GRAMD4	0.0155113	6.99813	21.6002	0.705246
CELSR1	0.0209049	6.89007	23.1302	0.629729
WNT8B	0.0399863	6.65912	51.8268	0.41684
SLC25A40	0.0378176	6.99172	118.086	0.358601
ADD2	-0.0211386	6.78167	17.3829	0.64466
RASAL2	0.0154335	6.95251	30.8168	0.713076
MARK3	0.0129721	6.99296	43.6987	0.752343
SLC25A3	0.00943174	7.26053	28.703	0.793807
FOSL2	0.00497344	7.03199	2.95568	0.901765
CACNG4	-0.0172871	6.89289	7.82233	0.689069
FRYL	-0.00262285	7.04741	0.893253	0.947676
TMEM131	-0.00479224	7.08333	3.95506	0.902846
FSCN1	-0.0173948	6.98054	10.2955	0.67361
ACTB	0.0035934	7.33084	9.53434	0.918022
MOCOS	0.074234	6.98829	143.539	0.0726452
PLD1	-0.00779212	6.94246	3.10015	0.85327
ATP12A	0.0389005	6.6834	28.2206	0.423175
WDR62	0.0734595	6.81525	255.491	0.104538
DLG1	0.00824257	7.01399	12.2228	0.839375
RAB7A	0.00463784	7.12429	6.50127	0.904118
BCAP29	-0.0080808	7.03369	7.86868	0.840801
SEC31B	-0.0200239	6.76152	13.3509	0.665697
SART3	0.030267	6.99503	177.033	0.461552
PAX2	0.028181	6.68861	20.8425	0.560369
EXOSC7	0.0364872	7.03908	242.854	0.364344
KIFAP3	-0.0232679	7.03315	40.5855	0.56278
MKRN2	0.00235402	7.00598	0.995328	0.954008
MCM6	0.0442626	7.12032	278.49	0.252288
REXO2	-0.0270072	7.12012	112.863	0.483125
RBM7	0.00567027	7.05673	3.1337	0.886714
RBMS2	-0.0213159	6.96151	37.0399	0.609155
BAZ2A	0.0169539	6.94383	101.077	0.687593
PTPN23	0.021293	6.93146	71.7701	0.615869
MLH1	-0.0247514	7.05681	42.0908	0.533315
UNG	0.0577829	7.05515	358.718	0.148106
FMO4	-0.0189301	6.8893	22.4682	0.661846
KLHL20	-0.0285666	6.95634	116.926	0.49419
RGS11	-0.0538122	6.75781	61.6554	0.245693
SLC46A1	-0.00269118	6.85818	0.479941	0.951269
PLXNA2	0.0032877	6.96618	0.800092	0.937082
SPAG5	0.1094	6.9763	754.93	0.00869776
ANKRD13A	-0.0145118	7.08195	45.7882	0.711686
TPD52	0.0210465	7.16272	30.6636	0.577949
ACACB	-0.0473831	6.95261	112.395	0.257228
TRAF4	0.0744897	6.95208	489.343	0.0770087
PAG1	-0.0124899	7.02501	11.183	0.757168
GPATCH1	0.0299295	6.97931	101.524	0.470093
ICAM3	-0.029436	7.01857	43.0888	0.467193
NT5C2	0.00446724	7.07108	3.63475	0.909995
MCAM	-0.063432	7.01829	288.973	0.116559
GPC4	-0.027834	7.01511	26.3797	0.492568
MBNL3	0.0158008	6.95095	15.4491	0.70679
RAP1GAP	0.0390574	6.97885	28.4762	0.346242
XAB2	0.00709162	6.9062	4.01741	0.868899
ARHGEF1	0.0111351	6.9196	7.573	0.794155
STXBP2	0.0477668	6.93944	159.205	0.259151
MAP2K7	0.0147713	6.88837	39.3746	0.733501
DGKD	0.00774701	6.98894	4.45751	0.850781
CTTNBP2	-0.0487825	6.80034	52.0209	0.281588
RARB	-0.0578012	6.86016	184.21	0.187533
TOP2B	-0.00293597	7.15292	1.95388	0.938341
TM9SF3	0.0135712	7.17339	24.3705	0.718274
NFKB2	0.0116669	6.90597	10.2796	0.786049
UBE2T	0.110894	7.04415	666.502	0.00593151
PPP1R12B	-0.116251	6.96712	467.43	0.00494892
DNAJC10	0.00382307	7.12671	2.63429	0.920805
GTF3C1	0.0110757	7.03154	21.292	0.783528
IL4R	-0.00734377	7.04091	6.67689	0.854641
USP33	0.0171399	7.05015	72.5457	0.667959
PAK3	-0.0783672	6.81161	187.202	0.081328
DCX	-0.101255	6.67989	127.647	0.0360427
SNRPA	0.0461488	7.06342	429.507	0.245802
EXOSC5	0.055044	7.00356	246.862	0.179317
DYNC1I2	-0.00448342	7.17404	6.06424	0.905004
APBB1IP	-0.0365517	6.9845	52.1845	0.374661
LRCH4	0.00877215	6.96782	8.15904	0.833097
FAM76B	0.0021446	6.95066	0.549688	0.959255
SIRT6	0.0249324	6.89266	151.481	0.564863
POLD3	0.0380825	7.01493	127.121	0.34962
ACTN2	-0.0523642	6.74709	64.0051	0.26148
CAPZB	0.00110597	7.15892	0.456842	0.976692
GPR137B	-0.0241703	7.02969	50.0142	0.548404
NAALAD2	-0.0666618	6.68349	83.9777	0.167409
SLC25A43	0.0257127	7.04154	64.3689	0.521892
UBE2A	0.0109052	7.14577	25.4009	0.774796
FGFR1	-0.0734156	6.92001	502.002	0.0838817
SMC1B	0.025454	6.65428	10.7851	0.605967
FBLN1	-0.195345	7.07244	1026.14	5.81041e-07
ITGA8	-0.119742	6.88691	309.992	0.00547392
CST7	-0.0357496	6.94082	42.1373	0.395817
MAP2	-0.0922176	6.84704	204.348	0.0364559
PIAS2	0.00836099	6.91188	6.03214	0.845266
AMPH	-0.117959	6.82726	608.263	0.00802354
ARAF	0.00824003	7.01354	10.0689	0.839459
MCCC1	0.0251894	7.0459	85.005	0.529494
LAMP3	0.020713	7.00312	11.6558	0.612704
FAP	-0.118301	6.97385	261.57	0.00410444
NEBL	0.00839551	6.90452	0.750557	0.84522
PIK3C3	-0.000341099	6.96484	0.0141725	0.993469
N4BP2	0.0122747	6.99111	6.55393	0.765459
TULP3	-0.0111783	6.96427	14.6555	0.78843
SYNJ2	0.0217018	6.95746	57.716	0.604315
ADCY2	-0.103961	6.78852	264.897	0.0222194
PPP2R5C	-0.00356432	7.0823	1.80985	0.927701
GNB1	0.00277123	7.18533	2.22104	0.940902
EDN1	-0.0285131	6.98469	27.6261	0.48875
MLLT10	0.00254521	6.98061	0.936561	0.95091
ZCWPW1	-0.0159115	6.81109	8.24476	0.724371
ADCYAP1R1	-0.0846407	6.71671	207.384	0.073827
FGF20	0.0220568	6.66351	4.25387	0.653107
P2RY10	-0.0500923	6.80418	59.4628	0.267841
ITM2A	-0.114686	7.06669	368.205	0.00356428
VDAC3	0.0149714	7.19841	52.1325	0.687137
PCM1	-0.0116605	7.09667	16.0263	0.764878
TNRC6C	-0.0501486	6.86272	200.404	0.252413
CBFA2T2	0.0140618	6.95346	17.7327	0.737449
ITCH	0.023802	7.00107	73.9709	0.561236
PKD2L2	0.0109761	6.61856	2.44222	0.82738
TP53INP2	-0.0165333	7.03277	22.7352	0.681084
SDF4	0.0186648	7.1418	59.4719	0.625172
MYH7B	0.0310488	6.69144	23.0385	0.520569
TP73	0.033109	6.7478	46.3094	0.479621
TOLLIP	0.0164956	6.94056	33.87	0.696088
UBE2D4	-0.00584305	7.00001	6.29132	0.886454
CLUL1	0.0076678	6.66453	1.12619	0.875667
RUNX1T1	-0.198295	6.85544	1130.64	5.59222e-06
CDH17	0.0505732	7.10348	15.5504	0.194685
THOC1	0.0196117	7.04171	59.6222	0.625064
FKBP7	-0.0639282	6.89754	358.086	0.137018
OSBPL6	-0.0517982	6.79803	86.0404	0.253421
SLC1A3	-0.039834	6.91566	39.8754	0.350242
XRCC5	0.0163032	7.14146	53.9675	0.669591
LXN	-0.0672701	7.07055	226.279	0.0875369
MKNK1	0.00109661	7.0136	0.328076	0.978482
TNS1	-0.127417	7.03291	740.682	0.00144252
REXO1	0.031977	6.80922	46.9892	0.480167
SAR1A	-0.00136003	7.1069	0.225314	0.972049
CDC14A	-0.00742547	6.77878	4.29686	0.871599
RAPGEF3	-0.0385372	6.82124	52.9769	0.389914
CEACAM1	0.0752963	7.06127	147.072	0.0589796
CIC	-0.00467364	6.97604	3.94745	0.910165
LIPE	0.00287308	6.81281	0.406898	0.949238
FDFT1	0.0302793	7.17998	95.9129	0.419846
PAFAH1B3	0.0703546	7.03616	363.774	0.0813233
OPHN1	0.00463431	7.0514	2.99613	0.907546
SCGN	-0.0273601	6.76114	7.08973	0.554874
PGM1	-0.0115022	7.11975	10.5505	0.765426
DDX1	0.0178593	7.18004	112.936	0.633964
DNM2	0.036543	6.99064	134.343	0.375252
EPB41L2	-0.0330447	7.06695	68.2073	0.403017
RIMS1	-0.124528	6.75409	212.531	0.00713168
MOXD1	-0.169601	6.91783	914.678	6.12703e-05
STX7	-9.63658e-05	7.06284	0.00111873	0.998062
KEAP1	0.0217639	7.05241	91.0416	0.585657
DDX43	-0.0162192	6.72967	2.16882	0.731002
PTPRH	0.0834077	6.97256	192.317	0.045529
DCT	-0.0151594	6.67146	8.99693	0.755836
SLC35C2	0.0366258	7.02189	174.819	0.366649
EPHA6	-0.0719319	6.6402	81.4768	0.146039
SCTR	-0.024893	6.71948	5.95965	0.599645
RFX3	0.0123475	6.82764	8.75918	0.782821
RAB21	0.00162709	7.07124	0.451814	0.967149
SLC4A4	-0.0166908	6.95886	3.1838	0.689377
SMARCA2	-0.0501398	7.04849	219.305	0.208221
RDH8	0.0193928	6.69504	6.49311	0.687414
SESN1	-0.0116449	7.05763	7.04295	0.769529
MID2	-0.0700478	6.8786	258.803	0.106576
COL5A3	-0.00427925	6.8741	0.970708	0.921929
SRCAP	0.0177273	6.88976	45.1279	0.682663
CHRNA3	-0.163366	6.79796	356.922	0.000292217
KCNN2	-0.0544595	6.74097	80.3981	0.244416
CNOT4	0.00625208	6.96614	8.5871	0.880698
PSEN1	0.0253602	7.00246	119.979	0.53564
CLDND1	-0.0221481	7.09033	114.319	0.570954
HSP90AA1	0.0226877	7.30078	282.467	0.522071
RBL1	0.0671966	6.85724	319.019	0.128755
DLGAP4	-0.00309212	6.98264	0.923348	0.9403
IGSF9B	-0.0163697	6.74266	7.51644	0.72672
NDC80	0.0872855	6.99934	440.834	0.0339397
AP4E1	0.0107248	6.91677	22.0243	0.801859
RSBN1	-0.0167421	7.05414	51.8218	0.674026
MAGI3	0.0059429	6.92356	4.35036	0.888991
CXCL2	0.0933639	7.02853	171.047	0.0213853
AFP	0.0564622	6.7108	34.2618	0.238246
COL4A4	-0.138335	6.80044	289.134	0.00215807
TCF7	-0.000262407	6.98449	0.00822001	0.994925
OSTM1	-0.0480334	6.99945	299.773	0.239503
CDH7	0.045643	6.61465	39.8973	0.366561
IMPG2	-0.020887	6.67503	12.5134	0.667598
PCNP	-0.00532478	7.16513	7.10408	0.887759
ARG2	0.0370804	6.85393	43.5799	0.40189
MEF2C	-0.115037	7.00347	929.384	0.00461805
PTPRC	-0.0475382	7.01283	103.39	0.241221
PKP1	0.0324377	6.72997	11.2962	0.492838
STK17B	-0.00929398	6.9971	7.3089	0.82055
CDC14B	0.00125913	6.95353	0.13934	0.976035
ZNF510	-0.00852879	6.8468	8.95712	0.847291
LRP2	0.052026	6.6838	35.5052	0.284354
JMJD4	0.0298853	6.87497	83.1233	0.49434
DUSP12	0.0246406	7.04284	98.7261	0.539107
AACS	0.0450054	7.02707	220.292	0.26629
KIAA0141	0.00109998	7.02138	0.256582	0.978331
CADPS2	-0.0062736	7.04986	3.20821	0.875094
PCDHB4	-0.108075	6.78752	437.758	0.0174882
ATP8B1	0.0322809	7.08802	69.4006	0.410845
IL12RB2	0.0121866	6.68944	3.99067	0.800921
SMARCD3	-0.103881	6.87154	582.498	0.0169161
WDR70	0.0103344	7.03146	16.9904	0.79769
FYB	-0.0539461	6.97334	88.6984	0.192209
MPP4	0.0237248	6.61596	11.1834	0.638148
BZW1	0.0207291	7.13168	61.6518	0.589305
PGR	-0.140888	6.75524	566.078	0.00230012
C1QTNF3	-0.121586	6.87415	463.705	0.00507972
ME2	0.0156066	7.09727	25.2768	0.689307
C5orf22	0.036527	6.99195	191.763	0.375146
CCNT2	0.0061684	6.99717	6.96117	0.880428
FAM135A	0.0420779	7.02829	148.098	0.298271
COL19A1	-0.0500413	6.65747	48.3441	0.30763
EPB41L3	-0.0973385	6.9494	275.513	0.0198218
COBLL1	0.00260973	7.02717	0.464641	0.948475
DLG3	0.0455969	6.96827	212.539	0.274267
KCNK2	-0.141921	6.67534	330.702	0.00331704
SERTAD4	-0.0997071	6.90479	193.832	0.0196844
TRAF5	-0.0294979	7.00415	62.3131	0.46948
MRPL22	0.0275206	7.10372	164.587	0.479726
GEMIN5	0.0299539	6.97883	115.574	0.46984
OPRK1	0.0411321	6.66026	30.7133	0.40334
NFE2L1	-0.000427981	7.12364	0.042035	0.991131
SEMA5B	-0.020221	6.85034	18.0338	0.647144
GSK3B	0.0269709	7.07587	118.508	0.494452
ITGB5	-0.0199982	7.12403	48.1481	0.603012
ERC1	-0.0183194	6.93037	49.2789	0.665472
XPO1	0.0238257	7.17026	207.251	0.527362
RNF13	-0.00580916	7.12366	5.95717	0.880034
TRPM3	-0.00314981	6.6926	0.318548	0.947898
PALB2	0.0381322	6.99306	246.978	0.354301
DOPEY1	0.0052649	6.95376	4.06157	0.900051
LYRM2	0.0050011	7.01466	2.89621	0.90207
BCKDHB	0.00505776	6.9582	1.51116	0.903745
ZCCHC6	0.0124289	7.00814	17.8169	0.760616
ULK2	-0.0719864	6.85818	255.072	0.100827
GRHL2	0.084185	7.00113	265.357	0.0405907
TNPO1	0.00677249	7.14534	6.91181	0.858969
PLOD1	0.0167022	7.08986	37.6879	0.669902
P2RX5	-0.0221603	6.84154	10.7494	0.617536
ITGAE	0.0115317	7.0955	19.2611	0.767823
DIS3	0.0255018	7.0011	107.401	0.533648
PIBF1	0.0106424	6.9896	12.4777	0.79604
TDRD3	0.00956441	6.95378	10.9307	0.819559
NUFIP1	0.038121	6.92357	129.763	0.371481
PDS5B	0.0130008	7.01121	23.689	0.749598
OXCT1	-0.0664059	6.98994	140.529	0.105251
RRAGB	-0.0604548	6.89223	228.606	0.160902
EPYC	-0.0159669	6.64897	1.5077	0.746436
CYLD	-0.0331373	6.96853	123.759	0.424758
SLC27A5	0.0376007	6.88575	56.4228	0.387395
ZNF324	0.0154843	6.88835	12.6816	0.721177
ZNF671	-0.0664028	6.8464	255.776	0.132654
ZNF416	-0.00604711	6.83219	2.37477	0.892246
ZNF586	0.00744311	6.93568	4.57857	0.860374
ZNF446	0.00682457	6.87006	4.65167	0.876137
ZNF264	-0.0267454	6.94377	56.2834	0.524842
RPS5	0.00718232	7.29075	15.3347	0.840001
YTHDC1	-0.00421706	7.10066	6.6002	0.913734
CHMP2B	0.0190334	7.12305	49.6389	0.621547
SMAP2	-0.0201874	7.06427	42.1372	0.610165
PPIE	0.0105236	7.0279	14.5105	0.794429
ZMPSTE24	0.0093452	7.17166	28.1844	0.803919
STARD7	0.0229543	7.18814	159.246	0.53909
REST	0.00852754	6.95271	14.4901	0.838914
HAL	0.0510156	6.71062	55.283	0.286495
SSH1	-0.0183273	6.9424	44.6732	0.663385
GSTP1	0.0272714	7.2296	96.377	0.456851
APLP2	0.00327847	7.14997	1.65088	0.931287
SLCO1A2	0.0495834	6.6537	36.5994	0.315813
WBP11	0.0238341	7.11718	130.737	0.537737
EIF3I	0.0268304	7.16485	195.018	0.477844
NKAIN1	0.0108052	6.68384	2.87233	0.823627
COL16A1	-0.0957324	7.00979	331.472	0.0181565
TXLNA	0.00555738	7.02132	5.64146	0.890884
APOB	0.00270652	6.80445	0.0392784	0.952391
NCOA1	-0.0208778	7.04496	91.118	0.601484
AGBL5	0.0206001	6.93923	40.9852	0.626008
KIF3C	-0.034153	6.86783	73.1999	0.434872
RAB10	0.0103975	7.20619	49.7424	0.778854
GCKR	0.0326184	6.79883	20.418	0.473906
HADHA	0.00672582	7.09885	9.16013	0.863031
MAPRE3	-0.0205025	6.82972	21.4679	0.646202
CAD	0.0445824	6.96879	224.518	0.284929
CD59	-0.0310678	7.15243	94.0819	0.412423
CD82	0.00777407	7.04352	4.32115	0.846159
BCORL1	0.0200911	6.9029	45.7603	0.640877
ATRX	-0.0135135	7.02316	46.293	0.73819
FCN1	-0.0826055	6.84583	146.73	0.0612557
MYNN	0.0104502	6.98606	13.2393	0.799994
SCAMP1	-0.0165426	7.0968	60.7526	0.671241
PREP	0.044797	7.06013	222.309	0.260646
HACE1	-0.0088504	6.93276	8.66912	0.834423
SEH1L	0.0412863	7.07181	243.397	0.296982
WDR47	-0.0213272	6.97512	65.6121	0.606475
WDFY1	0.0137475	7.13111	38.8436	0.720291
OVGP1	0.0216808	6.88119	27.4476	0.618726
SLC25A24	0.0179426	7.07124	32.1498	0.650021
MAP3K4	0.0030552	7.05949	1.64019	0.938721
PILRA	-0.0295026	6.89658	31.0614	0.493577
IGSF9	0.102488	6.86022	214.862	0.0205851
ABCB1	-0.106949	6.84981	313.663	0.0150428
ZNF213	0.0123361	6.92785	20.3765	0.771606
AKR1B1	-0.0327417	7.09619	64.721	0.400585
CPNE3	0.0104272	7.15162	22.0243	0.783817
RRN3	0.0218276	7.03926	67.7486	0.587012
CTTN	0.0238528	7.1233	70.5637	0.536205
WNT11	0.0391856	6.71911	14.056	0.410423
MTIF2	0.0354618	7.10961	271.154	0.361303
DDHD2	-0.0116811	7.03533	14.7349	0.771311
EPS15	-0.0187311	7.08524	107.172	0.632697
MGST2	0.0238414	7.15046	72.6793	0.531016
CHERP	0.0359589	7.02769	254.593	0.374035
ATG16L1	0.0237724	6.9288	78.4458	0.575966
USP40	0.0182996	6.91708	63.3773	0.668605
POMGNT1	0.0300517	6.97536	132.553	0.469179
RAD54L	0.129109	6.87262	552.685	0.00337616
MAST2	0.0109599	6.96077	13.007	0.793083
DNAJA1	0.030712	7.21015	190.188	0.406506
B4GALT1	0.0304096	7.0139	96.9471	0.455172
CHMP5	0.0126478	7.14494	19.6062	0.740145
NFX1	0.000341654	7.01991	0.0177029	0.993274
AQP6	0.026319	6.72383	19.1429	0.579074
IPO11	0.00782999	6.85271	2.91855	0.85936
FOLH1	0.0336164	6.74129	25.0136	0.474518
EPDR1	-0.0902976	7.00975	190.052	0.0259054
SNX10	0.0177401	7.02558	12.6651	0.660987
SEPHS1	0.0155048	7.06653	46.6551	0.695628
MRPL28	0.0294505	6.99826	127.21	0.472983
ITPKC	0.0369021	6.94354	143.171	0.382045
CEACAM6	0.0458775	7.19939	19.3818	0.21776
FAT2	0.00351673	6.68648	0.301544	0.942062
RBM22	0.00973913	7.10004	25.5851	0.802656
TMED2	0.020652	7.21334	94.8196	0.575934
ZFAND6	0.00555718	7.07618	3.13227	0.887892
HSD17B2	0.0551022	7.0472	25.8438	0.169459
PPEF1	0.0338645	6.67751	22.1947	0.486984
LAT2	-0.0365512	6.93242	72.4868	0.387342
HUWE1	0.0164434	7.19566	96.5391	0.658687
ZW10	0.0356882	7.0408	266.681	0.374513
ALG9	-0.00092625	6.97872	0.136188	0.982139
MYBPC2	-0.0124875	6.65729	2.26448	0.799461
NOX4	-0.0922224	6.85649	166.619	0.035516
ACOX3	0.0186643	6.96128	39.8932	0.655147
MTMR2	0.00699378	7.04321	8.44349	0.861451
PPP1R15A	0.0223653	7.03708	45.7087	0.578259
HSD17B14	-0.0287016	6.86045	40.6885	0.513436
TRIP6	0.00206754	7.02776	0.182532	0.959156
ACHE	0.000538245	6.76824	0.00352419	0.99071
FTL	0.00438792	7.32816	7.62658	0.900111
BAX	0.0371859	6.98356	78.7548	0.368646
NLK	0.0205259	6.98668	50.8123	0.618834
PIGS	0.0325763	7.01474	160.257	0.423554
ADAMTS2	-0.0487519	6.90302	59.3395	0.255826
ATXN7L3	0.0305217	7.00468	145.363	0.455606
PGS1	0.00233339	6.96049	0.876273	0.955449
PSMC5	0.0152368	7.14542	49.1056	0.689463
UIMC1	0.000439348	7.04171	0.0346836	0.991256
CETP	-0.0452705	6.73833	32.4334	0.334181
MMP2	-0.0825961	7.03324	379.806	0.0393087
LPCAT2	-0.0205453	6.93534	21.2787	0.62682
GNAO1	-0.119916	6.85048	550.376	0.00635492
OGFOD1	0.00673563	7.03632	9.54889	0.866967
SH3BP2	0.00793225	6.89272	13.2746	0.854546
ADD1	-0.0301794	7.12414	238.036	0.432262
L2HGDH	0.0508284	6.87084	185.194	0.246695
TXNDC16	-0.00985892	6.96498	8.98055	0.812855
C14orf166	0.00652555	7.194	9.78824	0.860876
NID2	-0.0497116	7.00094	113.541	0.22309
GMCL1	0.0382328	7.03328	172.21	0.343298
SF3B2	0.0275417	7.09012	156.438	0.482313
GNAS	0.0048603	7.24525	5.75895	0.893594
DNM1L	0.00493646	7.0891	4.27562	0.899709
PTHLH	-0.0964098	6.74394	224.225	0.038588
PHACTR3	-0.0173606	6.75225	3.36713	0.70942
ERGIC2	-0.00143843	7.07667	0.259015	0.970874
TFAP2C	0.0617927	6.84284	32.8358	0.165537
AURKA	0.123284	7.0541	657.662	0.00212803
CASS4	-0.0162833	6.68668	9.90603	0.73617
PIR	0.0275269	6.99493	33.1441	0.503044
RFX2	-0.026932	6.83648	48.9709	0.544917
SULT2B1	0.0580704	6.86473	94.2901	0.187287
ALG6	0.0349841	7.04475	208.594	0.383054
CNOT3	0.0362605	6.89907	114.791	0.401228
GP6	0.024482	6.68077	20.9289	0.614453
PTPN4	0.00894362	6.98417	11.1197	0.828488
DDX18	0.0271906	7.13722	206.21	0.477852
KHSRP	0.0365983	7.06416	190.321	0.35691
GNA11	0.0163017	7.1065	26.0604	0.674868
EDEM2	0.0382074	7.02615	191.042	0.345336
DNMT3B	0.0829109	6.86712	224.993	0.0597967
REM1	-0.0631451	6.80976	222.129	0.160929
TPX2	0.126162	7.04564	710.109	0.0017498
FER1L4	0.0431604	6.92162	32.7989	0.312243
PDRG1	0.0506854	7.02956	343.025	0.210175
EPB41L1	0.0360435	6.92216	62.7147	0.3984
SLC15A1	0.0743938	6.77449	45.7087	0.107855
DOCK9	-0.00611426	6.98491	5.22237	0.882116
ANKRD10	-0.0171475	7.06973	30.137	0.664171
TGDS	0.0371451	7.01127	196.145	0.362467
DOCK3	-0.0643421	6.6767	79.2526	0.184425
C3orf18	-0.0745585	6.82151	307.335	0.0955482
COQ9	0.0228703	7.07615	85.0036	0.562197
TMEM40	0.0415476	6.69738	32.385	0.388644
KIF9	0.0377913	6.97586	146.552	0.362794
ARHGAP28	-0.0818095	6.79065	192.188	0.0719521
CRLS1	0.0284129	7.11427	90.5435	0.463321
PPP1R13B	0.00596137	6.97962	3.48328	0.885427
ATRN	0.0242582	7.01726	52.5024	0.55053
SMOX	0.041906	6.93935	106.201	0.322057
SIGLEC1	-0.0335454	6.87479	64.2246	0.441429
NSFL1C	0.028039	7.07772	117.585	0.477144
SLC4A11	0.101179	6.92677	190.998	0.017934
C20orf194	-0.0850892	6.9537	417.369	0.0413765
ZNF343	0.0179213	6.88976	38.2107	0.679385
CPXM1	-0.100878	6.87731	231.327	0.0200096
F11	0.0295535	6.68211	17.6828	0.542949
XRN2	0.0212409	7.05355	46.834	0.594479
DYNLL1	0.0100735	7.2396	40.7537	0.782233
TESC	0.0184098	7.04463	4.67097	0.64592
SNX5	0.0276269	7.12255	148.025	0.473983
RPL6	0.00652201	7.30693	31.9581	0.853446
SIRPG	-0.00347264	6.82114	0.241885	0.938367
MAPKAPK5	0.0397857	7.01388	258.702	0.328796
P2RX7	-0.0616822	6.83892	134.521	0.164248
ESF1	0.0229267	7.0055	76.2592	0.574853
RBBP9	0.00206202	6.98495	0.480552	0.960132
ANAPC5	0.0138768	7.1323	64.4756	0.71762
SLC23A2	-0.0198403	6.89676	39.7489	0.645365
LHX5	0.0166623	6.66624	7.59154	0.733734
TASP1	0.02207	6.94704	56.862	0.600152
OAS1	0.0536462	7.06382	103.235	0.177391
RPLP0	0.00793744	7.31495	11.0102	0.821488
PXN	0.0177492	6.94807	39.8794	0.673108
SIRT4	-0.0231875	6.72781	19.0526	0.623302
RPH3A	0.0128858	6.71828	6.04268	0.786416
KIF16B	0.0175264	6.97262	18.4016	0.673134
TRMT6	0.0526106	6.99074	247.126	0.202168
CHGB	-0.0579312	6.80321	26.3788	0.200087
PEBP1	0.0108265	7.18647	14.8867	0.772079
TBX5	0.0143622	6.67343	3.67587	0.768416
BRAP	0.00202662	6.96419	0.532807	0.961227
ERP29	0.0203282	7.1896	118.688	0.586174
NOS1	-0.0250673	6.72981	17.369	0.594975
FUS	0.0288596	7.03322	149.204	0.474173
IGBP1	-0.00547472	7.10827	4.86931	0.887734
FXYD5	0.00683768	7.12493	3.1381	0.859013
ZNF302	-0.0285341	7.03237	67.8029	0.477936
GRAMD1A	-6.97516e-06	6.98666	3.94473e-06	0.999865
FXYD3	0.0586626	7.1382	86.3285	0.126221
HEPH	-0.0505285	7.05347	49.0979	0.203587
CMTM1	0.0439642	6.70724	54.2925	0.359058
KCNH4	0.0084186	6.67565	2.41246	0.862753
GANAB	0.0280081	7.09582	164.931	0.473705
GMIP	0.0237299	6.94788	58.2651	0.572894
RBM41	0.0109814	6.94115	14.0352	0.794714
BIRC5	0.128278	7.0192	688.943	0.00168908
LAG3	0.0238628	6.8309	11.0184	0.593835
MLF2	0.0346816	7.0906	191.551	0.376389
OTUB2	0.0576509	6.8082	123.481	0.203983
DDX24	-0.00811489	7.10514	20.1986	0.834477
ZBTB25	0.0071706	6.85927	5.00316	0.870646
NECAP1	0.0231453	7.05253	98.1076	0.562097
ARHGAP4	-0.00608758	6.91656	1.53336	0.886639
ANKRD24	0.0250717	6.73597	27.5063	0.594683
DHX32	0.00812356	7.08667	7.84869	0.835923
RCOR1	0.024104	6.99219	112.183	0.558054
LTBP4	-0.0749658	6.96337	298.021	0.071073
BLVRB	0.0276795	7.10482	47.4955	0.476959
SLC9A1	0.0182377	7.01684	17.5654	0.653525
SPTLC1	0.010813	7.15339	10.7025	0.775846
PAPOLA	0.0206904	7.17026	146.542	0.583029
CCNK	0.0287085	7.05617	205.251	0.471439
PCBP4	0.0156875	6.97118	34.8909	0.705911
RGS1	-0.0428929	7.14049	82.19	0.26024
YPEL3	-0.0326833	7.00298	97.0653	0.423074
MRPS33	0.0232527	7.11983	81.2412	0.547172
NDUFB2	0.0111306	7.1853	29.1313	0.765993
NUDC	0.0213371	7.12471	86.3699	0.579727
ICAM1	0.0107995	6.9728	5.02101	0.794816
STRN4	0.0277202	6.93825	102.905	0.512338
IRAK3	-0.0439959	6.88958	40.117	0.308663
LYZ	-0.00222932	7.25527	0.138977	0.950828
SI	0.0538112	6.88924	7.55765	0.215687
TFAP4	0.0377784	6.84883	92.0821	0.394388
PDCD7	0.00362044	7.05554	1.97298	0.927557
SPG21	0.0121821	7.12045	15.3512	0.752241
DNAJB11	0.0378075	7.17298	271.247	0.315652
THPO	-0.00209678	6.66161	0.0889997	0.965911
CHRD	-0.0760771	6.80977	224.725	0.0909848
FLT3LG	-0.0633104	6.79139	145.788	0.163998
RAB11FIP3	-0.0218119	6.95938	37.8497	0.601236
GNPTG	-0.00647669	7.03837	6.93191	0.871812
ZNF268	-0.023662	6.93291	36.7983	0.575915
GOLGA3	-0.00299107	7.05786	2.22313	0.940033
CD209	-0.051427	6.87402	96.9312	0.237691
MCOLN1	-0.00567068	6.93706	2.97383	0.89324
USP48	0.0182143	7.05024	49.2073	0.648512
EFNB1	0.0392186	6.9014	96.6457	0.363426
PDPR	-0.0215954	7.00123	40.2777	0.597125
AARS	0.0168421	7.12864	63.073	0.661338
GLG1	-0.00118385	7.13099	0.324814	0.975382
KIF4A	0.111754	6.97718	593.455	0.00734066
TNRC6A	-0.015469	7.00558	33.641	0.704466
PLEKHG2	-0.000663616	6.91164	0.0609283	0.987636
DLL3	0.0318898	6.71269	18.0241	0.504279
NAT14	-0.0165577	6.89933	12.3628	0.700599
PITPNM2	-0.00747746	6.84436	5.36867	0.866105
EXOC1	0.00664585	7.08662	10.1468	0.865445
OSBPL8	-0.0253933	7.09558	75.2523	0.514746
NLRC4	-0.0325926	6.75285	26.0711	0.483678
PUS7	0.0592556	7.05834	337.163	0.137456
LAMB4	0.00777473	6.62929	1.34528	0.876461
NRCAM	0.0307376	6.85948	12.1091	0.485702
LAMB1	-0.0322644	7.10445	110.381	0.405602
SLC26A4	-0.0206333	6.68366	11.4432	0.669883
SLC26A3	0.0364061	6.80387	3.69843	0.422957
DLD	0.0167928	7.1244	27.8604	0.662919
WDR7	-0.0282084	7.00042	136.262	0.48997
TXNL1	0.0148645	7.10967	25.6273	0.701632
IL5RA	-0.0210765	6.72471	15.2062	0.655858
CMTM6	0.0162899	7.14911	50.4319	0.668696
ITGA6	0.0356949	7.1151	105.173	0.356876
RAPGEF4	-0.0310804	6.82539	37.8287	0.48726
SMPX	-0.233081	6.73242	275.091	5.6998e-07
FH	0.0326555	7.12295	169.887	0.397407
TF	-0.00506306	6.77178	0.230653	0.91259
CDV3	0.00680701	7.16432	8.86804	0.856968
MYO15A	0.0016767	6.71828	0.131178	0.971856
ALKBH5	-0.00121977	7.11439	0.503739	0.974839
APOH	0.0624203	6.72327	38.0123	0.189357
NLRP1	-0.0238709	6.83444	49.8156	0.592021
PITPNM3	-0.0379471	6.83571	41.3164	0.393572
SPAG7	-0.000987052	7.06962	0.240941	0.980081
ZFHX4	-0.108328	6.81231	411.155	0.0157777
CPA1	-0.0124649	6.59009	1.85519	0.807345
ZC3HC1	0.0215945	7.0235	95.0699	0.59392
ESR1	-0.0705475	6.77424	238.064	0.124289
RGS17	-0.0411237	6.75756	47.3272	0.375388
ANGPT2	0.0211033	6.89349	11.7884	0.625871
TMEM101	0.0201407	7.00219	81.8736	0.622708
CD200	-0.0641764	6.93724	238.333	0.127555
CCDC80	-0.192706	6.97693	1014.48	2.61304e-06
CMA1	-0.117886	6.68516	245.03	0.0142809
PSME1	0.0207336	7.22103	99.3525	0.57303
PPP2R3C	-0.0135617	7.02996	25.1762	0.736429
MYH7	0.030958	6.68814	30.6351	0.522562
SLC7A8	0.00264276	6.96236	0.337089	0.949502
OSGEP	0.0256004	6.95536	103.373	0.541528
SLC22A17	-0.124975	6.85664	474.495	0.00431696
RNF31	0.0304661	6.85236	57.4613	0.491191
SCFD1	0.00992401	7.08325	25.5474	0.800606
HECTD1	0.0061588	7.10357	10.36	0.874186
HNRNPC	0.0192375	7.16326	109.8	0.61093
RPGRIP1	-0.00323401	6.72995	0.643234	0.945378
SUPT16H	0.0312379	7.09337	194.658	0.424884
TOX4	0.0104396	7.00165	24.2955	0.798645
TGM1	0.0221884	6.71018	15.9798	0.642483
TINF2	-0.0205178	7.07846	62.5923	0.601786
DAZL	-0.0784541	6.70208	114.039	0.100393
SEMA6A	-0.0783298	6.93264	87.6891	0.0633332
TRPM7	0.0100343	6.90434	18.1602	0.815541
TYRO3	0.0315529	6.88771	56.2893	0.467639
WDR76	0.0541326	6.82028	213.332	0.229835
CAPN3	-0.0252395	6.80836	23.2635	0.576293
SNAP23	-0.000250271	7.08088	0.00804302	0.994921
TBX15	0.0113901	6.73036	3.46143	0.809436
PHGDH	0.0114826	6.97868	2.57828	0.781527
COL9A3	0.0402517	6.80869	17.4448	0.374513
TEKT2	0.0189319	6.6828	6.98335	0.696459
CLSPN	0.0761023	6.77473	250.695	0.0999939
RFFL	0.0347633	6.89556	75.1415	0.421763
UNC13D	0.0370868	6.85934	46.791	0.40046
MFSD11	0.00340578	7.01072	1.00683	0.933345
DPYSL2	-0.0503151	7.16937	281.1	0.180346
TGFB2	-0.0539234	6.82914	129.643	0.226611
GPATCH2	0.0214759	6.93122	51.937	0.612888
NUP50	0.0409879	7.06405	277.61	0.30233
COMT	0.0169004	7.11225	35.4358	0.66277
VNN3	0.0615285	6.75084	64.3555	0.188942
ECHDC1	0.00174499	7.1101	0.321215	0.964093
LRRFIP2	0.0153748	6.98089	28.2264	0.710141
SEC22C	-0.0215955	7.00602	62.96	0.59624
XYLB	0.0622762	6.78919	231.654	0.174529
HDAC6	0.0203206	6.9639	65.05	0.626358
GABRP	-0.101233	6.94843	40.104	0.015427
CDC6	0.12201	6.91821	468.549	0.00453954
UPRT	7.6127e-07	6.97474	6.56302e-08	0.999985
CDC23	0.020841	7.04581	102.139	0.602825
AAAS	0.0285921	6.91444	109.746	0.504445
CBX5	-0.0106101	6.99671	7.38413	0.795691
FMO2	-0.174402	6.90416	623.76	4.25722e-05
MSH2	0.0523826	6.98942	189.189	0.204428
MAP3K1	0.00292433	7.07539	0.847915	0.940879
DHPS	0.0144222	7.02791	33.786	0.721082
HOOK2	0.0462252	6.98035	244.249	0.264791
ARCN1	0.0123517	7.15735	47.8504	0.744539
EPB41L4B	0.0545922	7.01441	103.943	0.180519
TMEM38B	0.0574263	7.01765	200.379	0.158323
PSMD5	0.0250933	7.01942	91.9426	0.53647
PTGS1	-0.0740586	6.98909	277.94	0.0708321
NUP188	0.0445061	6.9729	255.119	0.284745
CRAT	0.00139486	6.97789	0.146964	0.973121
SH2D3C	-0.0737086	6.91369	340.022	0.0836581
NANS	0.0453778	7.08648	176.465	0.248371
TBC1D2	0.020703	6.90349	23.4537	0.630651
PDE6C	0.00767083	6.55098	0.898723	0.883577
CWF19L1	0.022187	7.00178	94.6897	0.587936
SEMA4G	0.0777914	6.92857	268.773	0.0681305
BTAF1	0.00138652	7.06339	0.337205	0.972112
IKZF5	-0.00284647	6.94781	1.16461	0.946002
BLNK	-0.00143854	7.00439	0.0771807	0.971901
TLL2	0.0212891	6.73459	9.24224	0.651599
TDRD1	-0.00460957	6.68345	0.240788	0.924201
SORBS1	-0.144391	7.03641	535.642	0.000294898
CRTAC1	-0.131729	6.74036	360.484	0.00471728
IL11	0.0374179	6.80754	9.97035	0.409283
MYO3A	0.00770941	6.64856	1.10759	0.876129
WAC	0.00301879	7.16195	3.27887	0.936351
CREM	-0.0334407	6.97678	97.2306	0.418571
NUBP2	0.0260176	6.97121	100.176	0.531659
TPSD1	-0.0188378	6.68505	4.96597	0.696921
HIVEP1	-0.00550909	6.96963	5.39193	0.894532
TREM2	-0.0454585	6.91757	49.6325	0.285793
CRISP3	0.0704008	6.62747	18.8503	0.161182
FKBP5	-0.0538144	7.05114	182.211	0.176135
SRPK1	0.0544641	7.11418	478.315	0.160434
BRPF3	0.0214357	6.94983	49.9807	0.610147
MRPS18A	0.045371	7.05306	243.352	0.256269
PGC	-0.0308696	7.12277	3.41788	0.4221
TMEM14A	0.0277357	7.12526	66.1307	0.471662
EFHC1	0.00141427	6.93206	0.117629	0.973378
HSP90AB1	0.0338303	7.24	233.168	0.353835
MLN	-0.0103106	6.70366	1.53632	0.829514
CDC5L	0.0282302	7.04569	104.206	0.48113
ITPR3	0.051802	7.11	207.364	0.182698
ZNF184	0.0206474	6.9491	53.0574	0.623459
DSP	0.0632161	7.17183	232.402	0.094062
SIRT1	-0.00622513	7.04669	5.44701	0.876245
IFT74	-0.0258963	6.93705	29.4524	0.539505
JAK2	0.00945481	6.95825	3.0074	0.82119
IL12RB1	-0.00721891	6.86925	2.04832	0.868996
ABL1	-0.0303352	7.07741	126.984	0.440389
ACOT7	0.0437245	7.08406	175.307	0.266547
SH3GLB1	0.00669452	7.13713	7.79526	0.861122
CDC7	0.0658068	6.96207	253.481	0.116181
SYDE2	-0.0290263	6.72653	27.4696	0.538806
PCSK5	-0.0463352	6.99975	72.5224	0.256497
SCD	0.0958948	7.12065	354.167	0.0134009
TMED1	0.0219902	6.98393	49.8678	0.594583
ABLIM1	0.0011063	7.14467	0.102016	0.976844
ERMP1	0.0432629	7.04477	156.749	0.280947
RAB18	-0.0072483	7.08011	8.99664	0.85373
NRP1	-0.0758793	7.00592	355.304	0.0619114
HSD17B7P2	0.031791	6.70287	41.4708	0.507938
PRTFDC1	-0.00886092	7.01658	3.98349	0.827123
PALMD	-0.097368	6.86428	407.045	0.0257821
TSPAN15	0.0408823	6.99748	122.043	0.319666
H2AFY2	-0.050391	6.93982	66.5351	0.231228
MAST3	0.00912252	6.96002	8.34254	0.827216
MZF1	0.00685633	6.99001	4.43576	0.867691
OCEL1	0.004874	6.99634	2.87332	0.905419
MYO9B	-0.00541886	6.95831	4.95557	0.896844
KCNK6	0.0124677	6.99021	8.88269	0.76199
PSMD8	0.0258644	7.1338	110.822	0.500262
FBXL19	0.0368335	6.88932	127.636	0.39625
STX1B	0.00017152	6.69894	0.00152519	0.997151
HSD3B7	0.0410811	6.9756	89.2582	0.322687
SETD1A	0.0242598	6.88343	40.9031	0.577236
BCL7C	0.00293893	7.03479	0.935617	0.941767
MAGEB2	0.0782786	6.67241	53.1795	0.110058
EFNA2	0.0781686	6.83345	52.8064	0.0812089
CIRBP	-0.0446242	7.13461	301.985	0.242789
ATP5D	0.0190285	7.12017	41.2365	0.622126
PRKY	0.00323645	6.74801	0.119776	0.944809
IGFALS	0.01723	6.772	4.82956	0.709046
NDUFB7	0.00701918	7.09875	9.12187	0.857129
TIMM13	0.0338325	7.00504	87.481	0.408222
CDC34	0.0270248	7.025	112.721	0.504434
MTAP	0.0102865	6.92667	4.78573	0.808835
POLRMT	0.0417626	6.99221	212.774	0.31067
HCN2	0.0031876	6.76822	0.439324	0.945034
RASSF7	0.0583208	7.06355	371.79	0.142713
GADD45B	-0.0625129	7.01627	228.247	0.122345
PALM	-0.105777	6.92117	463.471	0.0125533
MADCAM1	-0.0413854	6.86404	49.6917	0.344799
MKNK2	0.00337296	7.16939	1.98399	0.92865
ARVCF	0.00517205	6.8473	1.91264	0.90708
RANBP1	0.050327	7.12452	311.746	0.192283
ZDHHC8	-0.00439186	6.97606	2.277	0.915561
KLHL22	-0.0209567	6.92509	41.9429	0.621773
MED15	0.0237665	6.98414	77.1591	0.565157
SERPIND1	0.0187513	6.65975	4.32077	0.702946
SNAP29	0.00957228	7.02316	13.1439	0.813076
CRKL	0.0119375	7.0828	26.8515	0.761354
LZTR1	-0.00482995	6.99918	3.28015	0.906085
MMP11	0.0186751	6.97585	5.25081	0.65256
CECR2	-0.00214806	6.71133	0.171439	0.964081
SMARCB1	0.0247614	6.98575	85.1864	0.548686
DERL3	0.000769603	6.9111	0.0188749	0.985667
SLC7A4	0.0119165	6.75796	2.24932	0.797822
BCL2L13	0.0033284	7.01992	2.0031	0.934555
OSM	0.046615	6.84057	25.1982	0.295672
CABIN1	-0.00166221	6.98367	0.297695	0.967872
TBC1D10A	0.00241774	6.93927	0.919521	0.954339
SUSD2	-0.0550075	6.89492	103.946	0.201552
SF3A1	0.0107029	7.06128	28.8435	0.787594
GGT5	-0.107436	6.88882	352.891	0.0126593
RNF215	-0.000829759	6.76069	0.0323662	0.985737
SEC14L2	0.0142825	6.81961	14.019	0.750912
PPIL2	0.0146578	6.91075	44.2042	0.732486
UPB1	0.00701276	6.7644	2.21935	0.879717
YPEL1	-0.0481761	6.78672	105.822	0.291185
SNRPD3	0.0248343	7.12702	84.5609	0.518834
PES1	0.0358537	6.96562	191.308	0.390339
MAPK1	0.00330109	7.09274	2.2719	0.93271
GGT1	0.0370097	6.83485	41.1327	0.40755
PPM1F	-0.0507564	6.97332	238.49	0.219917
TOP3B	0.0194338	6.81437	26.8718	0.666767
CRYBB3	0.0291706	6.67858	48.786	0.54898
DGCR14	0.0095182	6.86657	7.22055	0.828242
MFNG	-0.0567615	6.91014	175.987	0.18402
CARD10	0.0380935	7.02827	118.31	0.346263
LRP5L	0.0309051	6.82656	41.1403	0.490957
SLC25A1	0.046716	7.01893	190.966	0.250519
PLA2G3	0.0730622	6.72561	63.8518	0.124225
LGALS2	0.0564562	6.97608	36.1698	0.174406
GGA1	0.0122348	7.11273	25.7743	0.75211
HIRA	0.0215072	6.94759	42.5893	0.609369
SEZ6L	-0.035189	6.71586	31.6006	0.458733
LGALS1	-0.0614823	7.22599	334.848	0.0924072
HPS4	0.0219	6.90576	60.6493	0.610629
PIK3IP1	-0.0674627	6.99918	352.18	0.0982314
SRRD	0.0236838	6.97899	93.8473	0.567522
PATZ1	0.0209129	6.90617	46.8574	0.626714
TRIOBP	-0.0187002	7.08564	57.0952	0.633191
TFIP11	0.0170906	6.9822	62.4469	0.679329
GCAT	0.0552785	6.95854	183.407	0.187467
CRYBB1	-0.0147414	6.68642	9.58431	0.760401
ANKRD54	0.0288134	6.97966	128.135	0.486706
MICALL1	0.0086281	7.00023	6.88469	0.833117
CCDC134	0.0369715	6.85777	112.687	0.402314
DEPDC5	0.0163585	6.88351	30.9463	0.706871
PICK1	0.0304885	6.93239	97.1854	0.472543
TTC28	-0.0856957	6.90555	366.15	0.0450792
SLC16A8	0.0301809	6.70294	35.19	0.529608
CENPM	0.107666	6.97463	477.259	0.00987402
SLC5A1	0.0412255	6.96798	19.6428	0.322868
SLC5A4	-0.00854892	6.62847	2.07836	0.864214
KDELR3	0.0204477	7.11313	24.8088	0.597678
CYP2D6	0.0339808	6.79584	46.6676	0.4564
DDX17	-0.00404827	7.17506	3.23157	0.914147
DMC1	0.0172862	6.82223	8.42789	0.700483
TCF20	0.0363512	7.0134	190.208	0.372282
HSCB	-0.00790541	6.99947	6.23749	0.846831
CBY1	-0.00618877	7.00257	5.6243	0.879629
TOMM22	0.034016	7.07793	172.476	0.388556
JOSD1	0.0144496	7.08821	43.2708	0.712469
FBXO7	0.00803221	7.08715	23.5107	0.837704
GTPBP1	0.0153014	6.94178	70.7671	0.716917
POLDIP3	0.00469736	7.01091	6.00408	0.908161
RAB36	-0.00377236	6.82622	0.620577	0.932877
TIMP3	-0.138768	7.05815	678.354	0.000438735
SBF1	0.0091673	6.96261	9.36914	0.826156
CYB5R3	-0.0309438	7.1847	256.083	0.407039
DNAL4	0.0158396	6.97014	28.6841	0.703346
MIOX	0.0331105	6.66597	20.5104	0.499542
LMF2	0.0101418	7.0387	13.3233	0.800675
RHBDD3	0.0366932	6.89958	161.792	0.395519
PACSIN2	0.0029253	7.13284	1.63168	0.939178
TTLL1	-0.022046	6.83117	43.597	0.621286
RASL10A	-0.00744037	6.72455	1.79621	0.875098
AP1B1	0.0160536	7.003	40.8196	0.694745
TOM1	0.00966207	6.9521	11.0451	0.817904
NEFH	-0.0620004	6.7089	110.478	0.19283
CHKB	-0.00210386	7.02875	0.451558	0.958409
BIK	0.0697485	7.06288	152.938	0.0799131
HMOX1	0.00559814	7.00717	1.52658	0.890862
MCAT	0.0532342	6.9821	320.01	0.198852
THOC5	0.0120822	6.9775	23.4312	0.770572
MCM5	0.0574934	7.03299	296.034	0.154662
ARSA	0.00495622	6.9177	1.73359	0.907605
TSPO	0.0229217	7.19232	55.2896	0.538855
RASD2	-0.0799899	6.79084	228.958	0.0785065
TTLL12	0.0505983	7.08889	306.515	0.197661
CBX7	-0.0992509	7.00027	679.851	0.0147705
PDGFB	-0.00307631	6.87863	0.832884	0.943702
CABP7	0.00460811	6.66732	0.462926	0.924953
RPL3	0.00327576	7.30119	5.13944	0.926262
ZMAT5	0.00344503	6.92817	1.12745	0.935348
SYNGR1	-0.0880228	6.87423	297.803	0.0428537
ASCC2	0.0193335	7.03811	43.7452	0.630588
MTMR3	-0.00268747	6.95447	1.43177	0.94884
APOL4	-0.00615424	6.81122	1.6209	0.891566
APOL1	0.0339097	7.04876	57.2636	0.396865
PNPLA3	0.0521719	6.73236	52.411	0.269932
MYH9	-0.010865	7.13722	26.15	0.776239
CACNA1I	0.00825267	6.74623	2.08445	0.860058
SAMM50	0.0121448	7.07384	29.3033	0.758376
TXN2	0.0214215	7.03241	63.6949	0.59524
FOXRED2	0.0419142	6.88252	78.3806	0.336233
GRAP2	-0.0166012	6.72864	9.28469	0.725066
EIF3D	0.0147066	7.19455	58.9881	0.692916
TNRC6B	-0.0330917	7.02043	118.847	0.4132
SGSM3	0.0161969	6.97064	23.4392	0.696916
NCF4	-0.0409739	6.92266	73.5187	0.334844
CSF2RB	-0.0493895	6.98418	108.34	0.230054
SLC25A17	0.034726	6.95599	197.238	0.407693
UPK3A	0.0420713	6.68859	21.8035	0.385066
FAM118A	-0.0107261	6.90958	6.17857	0.802325
KCTD17	0.00612122	6.83709	2.54162	0.890724
ST13	0.000688486	7.16947	0.116445	0.985415
IL2RB	-0.0174551	6.98867	11.2304	0.671268
RBX1	0.00970672	7.15134	24.6621	0.798439
EP300	0.00141499	7.00678	0.23536	0.972332
L3MBTL2	0.0167891	7.00059	55.1982	0.681888
RANGAP1	0.0534809	7.01393	372.531	0.189632
ZC3H7B	0.0143184	6.92225	24.1879	0.73694
PHF5A	0.0280991	7.11251	161.686	0.468648
ACO2	0.0187234	7.05915	47.5481	0.637903
POLR3H	0.0214894	6.9618	65.1542	0.607056
TRMU	0.0447076	6.89881	209.261	0.300982
PMM1	-0.0131904	6.98093	12.6352	0.749437
CERK	-0.0276936	7.06105	74.2309	0.484812
BRD1	0.00977375	6.98247	18.0609	0.813018
ZBED4	0.0433695	6.93705	224.391	0.306061
MLC1	0.00530894	6.67976	0.542972	0.912973
HDAC10	0.0267314	6.81742	105.865	0.553181
KCNK10	0.0361654	6.8371	26.7057	0.41775
ABHD4	-0.000830398	6.96261	0.123588	0.984118
FKBP3	0.0194965	7.0924	43.595	0.618383
CTSG	-0.201211	6.82733	618.708	5.62076e-06
GZMH	-0.032303	6.91829	17.2154	0.448306
GZMB	0.0588557	6.98532	58.2712	0.154922
RBM23	0.00962825	7.08167	29.7379	0.806573
PRMT5	0.0438068	7.0542	300.005	0.272714
COCH	0.00813451	6.96591	1.42702	0.845213
AP4S1	-0.0244671	6.89726	71.2957	0.570155
POLE2	0.0943179	6.96432	525.662	0.0244274
SOS2	-0.0103798	6.96258	23.5159	0.803395
CDKL1	0.0100735	6.77834	3.87824	0.82665
NIN	-0.0600286	6.98568	282.469	0.144097
PYGL	-0.0348273	6.95617	42.8918	0.404448
TRIM9	-0.0989133	6.71533	235.188	0.0367044
PSMC6	0.0199606	7.16118	77.108	0.597972
GNPNAT1	0.0472305	7.06557	235.431	0.234442
DDHD1	-0.0109748	6.91523	14.4649	0.797256
CDKN3	0.0919732	7.04175	387.875	0.022488
CGRRF1	-0.0243325	6.98162	85.453	0.555365
ATP6V1D	0.00763314	7.132	13.4087	0.842287
C14orf105	-0.000829269	6.70728	0.0054115	0.986162
PLEK2	0.0899585	7.07379	279.358	0.0233278
PIGH	0.0209594	6.95349	39.0734	0.61744
PSMA3	0.0297689	7.12349	136.577	0.440241
VTI1B	0.00192967	7.08227	0.808136	0.960833
TIMM9	0.0190928	7.03437	54.0842	0.635476
GSTZ1	0.0440154	6.9448	106.719	0.297007
KIAA0586	0.00889077	6.92288	13.8195	0.834676
TMED8	0.0016364	6.97936	0.832187	0.968445
AHSA1	0.0403779	7.11993	289.345	0.296313
DAAM1	-0.0466644	7.02252	230.743	0.247702
SPTLC2	0.0382765	7.02253	185.987	0.34534
RIN3	-0.0320974	6.89878	109.759	0.455783
LGMN	-0.0127879	7.14358	17.0329	0.737175
ALKBH1	0.0173622	6.95227	54.3719	0.679178
SNW1	0.018757	7.07372	104.258	0.634869
CHGA	-0.0653396	6.91629	25.5073	0.124826
ITPK1	0.0343832	7.0591	126.5	0.387885
DHRS7	-0.0154286	7.08294	20.7424	0.694206
PPM1A	-0.00756082	7.02675	6.4777	0.851435
SIX4	0.00153112	6.84047	0.0452147	0.972529
ASB2	-0.154496	6.84704	388.02	0.000439271
ERH	0.022127	7.19755	143.614	0.552012
HIF1A	0.00257329	7.1965	0.892624	0.944823
EIF5	0.0163328	7.14985	45.3213	0.667763
SERPINA4	0.0366504	6.88085	17.8485	0.40069
SLC8A3	-0.0323577	6.70894	27.5513	0.497403
DICER1	-0.00357174	7.0492	2.32175	0.928724
ZFYVE21	-0.0171527	7.07519	51.5441	0.663226
MTHFD1	0.0437103	7.06011	274.653	0.272363
TCL1A	-0.0839048	6.7618	65.5547	0.0692359
ZC3H14	0.00958004	7.0438	18.5639	0.811026
TELO2	0.0265728	6.93315	73.6022	0.531005
BDKRB1	-0.0717035	6.7887	183.902	0.115339
VRK1	0.0612263	7.02727	370.055	0.130786
PSMC1	0.0163174	7.17746	100.622	0.663891
PAPLN	-0.123555	6.91322	506.701	0.00365734
RPS6KA5	-0.0262254	6.97512	48.7686	0.526351
C14orf93	0.0160082	6.89093	33.7586	0.711794
PSMB5	0.0314105	7.13211	212.143	0.413538
YY1	0.0190239	7.159	121.651	0.615617
ACIN1	0.0211104	7.00796	95.0303	0.605033
CCNB1IP1	0.0206523	7.08782	54.3145	0.598572
TRIP11	0.00372835	6.96846	2.25822	0.928589
APEX1	0.0179287	7.17454	59.9782	0.633543
PABPN1	0.0152053	7.00957	23.874	0.709194
EFS	-0.0979062	6.85	461.297	0.026082
ARHGAP5	0.00635478	7.01225	7.52703	0.875914
CINP	0.0305129	6.9314	183.049	0.472417
DHRS2	0.113937	6.80505	93.8177	0.0125002
SRP54	0.0223418	7.10216	106.955	0.566317
CPNE6	-0.00608122	6.69439	0.735337	0.899487
CHD8	0.00787123	7.01284	6.25527	0.846603
PCK2	0.061086	7.04585	260.064	0.128111
[truncated: 10,960 more rows]
